# The sensorimotor strategies and neuronal representations of tactile shape discrimination in mice

Chris C Rodgers<sup>1,2,3,\*</sup>, Ramon Nogueira<sup>1,2,4</sup>, B Christina Pil<sup>1,2,3</sup>, Esther A Greeman<sup>1,2,3</sup>, Stefano Fusi<sup>1,2,3,4</sup>,  
Randy M Bruno<sup>1,2,3,\*</sup>

<sup>1</sup>Department of Neuroscience, Columbia University, New York, NY 10027

<sup>2</sup>Zuckerman Mind Brain Behavior Institute, Columbia University, New York, NY 10027

<sup>3</sup>Kavli Institute for Brain Science, Columbia University, New York, NY 10027

<sup>4</sup>Center for Theoretical Neuroscience, Columbia University, New York, NY 10027

\*Correspondence: [xrogers@gmail.com](mailto:xrogers@gmail.com) (C.C.R.) and [randybruno@columbia.edu](mailto:randybruno@columbia.edu) (R.M.B.)

## Summary

Humans and other animals can identify objects by active touch, requiring the coordination of exploratory motion and tactile sensation. The brain integrates movements with the resulting tactile signals to form a holistic representation of object identity. We developed a shape discrimination task that challenged head-fixed mice to discriminate concave from convex shapes. Behavioral decoding revealed that mice did this by comparing contacts across whiskers. In contrast, mice performing a shape detection task simply summed up contacts over whiskers. We recorded populations of neurons in the barrel cortex, which processes whisker input, to identify how it encoded the corresponding sensorimotor variables. Neurons across the cortical layers encoded touch, whisker motion, and task-related signals. Sensory representations were task-specific: during shape discrimination, neurons responded most robustly to behaviorally relevant whiskers, overriding somatotopy. We suggest a similar dynamic modulation may underlie object recognition in other brain areas and species.

|    |                                |    |
|----|--------------------------------|----|
| 26 | <b>Table of Contents</b>       |    |
| 27 |                                |    |
| 28 | Introduction.....              | 3  |
| 29 | Results .....                  | 4  |
| 30 | Discussion .....               | 11 |
| 31 | Author Contributions .....     | 16 |
| 32 | Acknowledgements .....         | 16 |
| 33 | Figures (with legends) .....   | 17 |
| 34 | STAR Methods .....             | 24 |
| 35 | References .....               | 34 |
| 36 | Supplemental Information ..... | 39 |
| 37 |                                |    |

38

## Introduction

39

Animals have evolved sophisticated abilities to recognize objects, such as landmarks around food sources. Peripheral sensory neurons detect low-level object features and the central nervous system integrates them into a holistic representation of shape, endowed with behavioral meaning. This integration can be over time, space, or even multiple senses. Moreover, animals choose how to move their sensory organs to most effectively gather information about the world (Gibson, 1962; Yang et al., 2016c). A key challenge in neuroscience is to understand the strategies animals use to explore the world and how they integrate those motor actions with the resulting sensory input.

46

47

We investigated this problem in the mouse whisker system. Rodents rely on their whiskers (macrovibrissae) for social interaction and guiding locomotion (Grant et al., 2018; Gustafson and Felbain-Keramidas, 1977; Stüttgen and Schwarz, 2018). The whiskers, like human fingertips, are moved together onto objects in order to identify them (Ahissar and Assa, 2016; Diamond, 2010). Head-fixation permits precise quantification of whisker motion and contacts in high-speed video, as well as a wealth of modern techniques for monitoring and manipulating neural activity (Adesnik and Naka, 2018). Moreover, the individual columns of barrel cortex that process input from each whisker are readily identifiable *in vivo*. Thus, the whisker system is well-suited to the study of active touch, given an appropriate behavioral task.

55

56

The mouse's ability to recognize novel objects is a model of cognition in health and disease (Lyon et al., 2012), but the underlying sensorimotor strategies and neuronal mechanisms are not understood. This is in part due to a paucity of suitable behavioral paradigms. On the one hand, freely moving rodents use their whiskers to identify objects and obstacles (Brecht et al., 1997; Hutson and Masterton, 1986; Voigts et al., 2015), but tracking multiple whiskers in freely moving animals is challenging (Petersen et al., 2020; Voigts et al., 2008). It is also difficult to ensure that freely moving rodents use only their whiskers, instead of vision, olfaction, or touch with skin (Mehta et al., 2007). On the other hand, most tasks for head-fixed mice focus on spatially simple features, like the location of a pole or the texture of sandpaper (Chen et al., 2013; O'Connor et al., 2010a). Indeed, the head-fixed mouse is often trimmed to a single whisker, though a few studies have considered multi-whisker behaviors (Brown et al., 2020; Celikel and Sakmann, 2007; Knutsen et al., 2006; Pluta et al., 2017).

67

68

We asked how mice discriminate objects of different curvature (concave or convex). Curvature is one of the fundamental components of form, and discriminating curvature requires integrating information over space (Connor et al., 2007; Lederman and Klatzky, 1987). Shape discrimination has never been studied with precise whisker tracking (although *cf.* Anjum et al., 2006; Brecht et al., 1997; Diamond et al., 2008; Harvey et al., 2001; Polley et al., 2005). Curved stimuli have been used in the visual and somatosensory systems of primates, but typically in passive presentation (Nandy et al., 2013; Yau et al., 2009). Active sensation is critical for shape discrimination in humans and other species (Chapman and Ageranioti-Bélanger, 1991; von der Emde, 2010; Klatzky and Lederman, 2011) yet the underlying neural mechanisms remain unknown.

77

78

We set out to understand the sensorimotor strategies and neuronal representations of shape discrimination. We trained head-fixed mice to discriminate concave and convex shapes while tracking every contact they made on the shapes with an array of whiskers. For comparison, other mice were trained simply to report the presence or absence of the same shapes regardless of their identity. We used behavioral decoding to reveal which sensorimotor features were critical for their decisions. Shape discrimination mice compared contacts across whiskers whereas shape detection mice simply summed up contacts across whiskers. Population recordings in barrel cortex revealed a persistent representation of the mouse's choice on individual trials in addition to other sensory, motor, and task variables. Most

85

86 importantly, during detection the neural population encoded contact by each whisker equally whereas  
87 during discrimination responses to behaviorally relevant whiskers were enhanced. Our multi-pronged  
88 approach of behavioral classification and neural encoding and decoding models reveals how the barrel  
89 cortex integrates fine-scale sensorimotor events into high-level representations of form.

## 90 **Results**

### 91 **The shape discrimination and shape detection tasks**

92 We developed a novel behavioral paradigm for head-fixed mice that challenged them to discriminate  
93 shapes (Supplemental Video 1). On each trial, a linear actuator moved a curved shape (either convex or  
94 concave) into the range of the whiskers on the right side of the face, though mice had to actively whisk to  
95 contact it. The shape stopped at one of three different distances from the mouse (termed close, medium,  
96 or far; Fig 1A,B), ensuring recognition was position-invariant and that mice did not memorize the location  
97 of a single point on the object. Mice could also generalize to flatter, more difficult stimuli (Supplemental Fig  
98 1A).

99  
100 Mice learned to lick left for concave and right for convex shapes in order to receive a water reward. Two  
101 seconds after the shape started moving, and soon after it reached its final position, the “response window”  
102 began (Fig 1C). The first lick in the response window (the “choice lick”) determined whether the trial was  
103 correct or incorrect. Early licks had no effect, but mice increased their rate of correct licks and licks  
104 concordant with the eventual choice lick as the response window approached (Fig 1D), indicating the  
105 formation of their decision. Mice could learn the trial timing from the sound of the actuator, but whiskers  
106 were required to identify the shape (Supplemental Fig 1B).

107  
108 To unambiguously identify each whisker in videography, we gradually trimmed off whiskers on the right  
109 side of the face throughout training. The middle (C) row was spared: C1 is the caudal-most and longest  
110 whisker; C3 is the rostral-most and shortest whisker still capable of reaching the shapes. Mice were  
111 strongly impaired by each trim, falling to chance or near-chance levels, suggesting that they initially relied  
112 on many whiskers (data not shown). However, with retraining, many were able to discriminate shape with  
113 only these 3 whiskers. Some mice retained a straddler whisker (“C0”), but it rarely made contact and was  
114 excluded from analysis.

115  
116 We trained a separate group of mice on a “shape detection” task (Fig 1E) to determine whether the  
117 behavioral and neural responses were specific to shape discrimination or were simply due to the shapes  
118 themselves. In this control task, mice learned to lick right in response to either shape and to lick left on  
119 trials when the actuator presented an empty position with no shape. The shapes, trial timing, and trimming  
120 were identical to those for discrimination.

121  
122 Both groups of mice learned to perform well above chance (Fig 1F;  $n = 5$  detection mice and 10  
123 discrimination mice). Detection mice more accurately reported the presence of a shape when it was closer  
124 (Fig 1G). Discrimination mice identified concave shapes equally well at all locations, but were more likely  
125 to identify convex shapes correctly when closer. Thus, shape discrimination relied on “detecting  
126 convexity”, an observation we return to below.

### 127 128 **The whisk cycle synchronizes contacts across multiple whiskers into packets**

129 To identify how mice identified the shapes, we acquired video of their whiskers at 200 frames per second.  
130 This large dataset—15 mice, 88.9 hours, 115 sessions, 18,514 trials, 63,979,800 frames—necessitated  
131 high-throughput automated tracking. To do this, we used the human-curated output of a previous-

132 generation whisker tracking algorithm (Clack et al., 2012) to bootstrap the training of a deep convolutional  
133 neural network (Insafutdinov et al., 2016; Mathis et al., 2018; Pishchulin et al., 2015). This method  
134 successfully tracked the full extent of the whiskers even as they moved rapidly, became obscured, or  
135 contacted the shape (example frames: Supplemental Fig 2A).

136

137 Trained mice whisked in stereotyped patterns that could differ widely across individuals (Fig 2A). We  
138 decomposed whisker motion into individual cycles (Fig 2B,  $n = 882,893$  whisks from 15 mice, excluding  
139 inter-trial intervals). Individual whisks had a mean duration of  $64.1 \pm 4.0$  ms, equivalent to a whisking  
140 frequency of 15.6 Hz, with an amplitude (peak-to-trough angular difference) of  $10.6 \pm 1.9^\circ$  (mean  $\pm$   
141 standard deviation of the within-mouse average; Supplemental Fig 2B). Mice made contacts near the peak  
142 of the whisk cycle (Fig 2C), synchronously across whiskers (Fig 2D; *cf.* Sachdev et al., 2001).

143

144 Compared with the detection group, mice performing shape discrimination made more single- and multi-  
145 whisker contacts (Fig 2E). Both groups made C3 contacts less frequently because it was too short to  
146 touch the shapes at the further positions. However, the shape discrimination group made much longer  
147 duration contacts with the C3 whisker than the shape detection group (Fig 2F), suggesting an important  
148 role for this whisker in discrimination. During both tasks, performance increased with the number of  
149 contacts made on each trial (Fig 2G). In combination with the stereotyped whisking pattern, this suggests  
150 mice relied on a pre-planned motor strategy rather than an closed-loop strategy (Yang et al., 2016c; Zuo  
151 and Diamond, 2019a). In sum, the whisk cycle synchronizes contacts across multiple whiskers into  
152 discrete packets of sensory evidence, which mice use to identify shape.

153

#### 154 **Mice rely on brief “tapping” of the stimuli**

155 The way mice contacted these shapes fundamentally differed from previous reports of mice and rats  
156 exploring different objects. We exclusively observed tip contact whereas mice localizing poles make  
157 contact with the whisker shaft (Hires et al., 2013, *cf.* a similar observation in rats discriminating texture in  
158 Carvell and Simons, 1990). We never observed mice dragging their whiskers across the objects' surfaces,  
159 as they do with textured stimuli (Carvell and Simons, 1990; Jadhav et al., 2009; Ritt et al., 2008).

160

161 Contacts were brief (median 15 ms, IQR 10-25 ms,  $n = 167,217$ ; Supplemental Fig 2C). Whisker bending,  
162 a commonly used proxy for contact force (Birdwell et al., 2007) but see also (Quist et al., 2014), was  
163 dynamic (Fig 2H): a whisker could bend slightly while pushing into a shape and then bend in the other  
164 direction while detaching. Occasionally we observed double pumps, a signature of active exploration  
165 (Wallach et al., 2020).

166

167 Strikingly, the contact forces we observed were much smaller than in previous reports of other tasks. The  
168 typical maximum bend ( $\Delta\kappa$ ) was  $5.1 \pm 1.0$   $m^{-1}$  for C1,  $11.2 \pm 1.2$   $m^{-1}$  for C2, and  $19.1 \pm 3.3$   $m^{-1}$  for C3  
169 (mean  $\pm$  SEM over mice; Fig 2I), much less bent than the  $50\text{-}150$   $m^{-1}$  typical of pole localization or  
170 detection (Hires et al., 2015; Hong et al., 2018; Huber et al., 2012). This sensorimotor strategy of “minimal  
171 impingement” onto the shape is the mode used by freely moving rodents investigating objects and may  
172 thus be more naturalistic (Grant et al., 2009; Mitchinson et al., 2007).

173

#### 174 **Behavioral decoding reveals the sensorimotor features that guide behavior**

175 To uncover the strategies mice used to perform this novel task, we turned to behavioral decoding. First,  
176 we quantified a large suite of sensorimotor features from the video (*e.g.*, contact location, cross-whisker  
177 contact timing) as well as task-related variables (choice and reward history). Then we trained linear  
178 classifiers using logistic regression to predict either the stimulus identity (concave vs convex for

179 discrimination; something vs nothing for detection) or the mouse's choice (lick left or lick right) on each trial  
180 using those features (Fig 3A).

181

182 Predicting the stimulus indicated which features carried information about shape whereas predicting  
183 choice indicated which features might have influenced the mouse's decision. However, an important  
184 challenge was to disentangle the extent to which each feature predicted stimulus or choice (Nogueira et  
185 al., 2017). These two variables are correlated; indeed, they are perfectly correlated on correct trials. To  
186 directly address this, we weighted error trials in inverse proportion to their abundance, such that correct  
187 and incorrect trials were balanced (*i.e.*, equally weighted in aggregate). This notably improved our ability to  
188 predict the mouse's errors (Supplemental Fig 3A).

189

190 To identify the most important features, we compared the accuracy of separate decoders trained on every  
191 individual feature during shape discrimination (Fig 3B, left). The most informative feature for decoding both  
192 stimulus and choice was a two-dimensional binary array representing which whisker made contact at each  
193 timepoint within the trial, which we term "whisks with contact" (schematized in Fig 3A). The next most  
194 informative feature was "whisks without contact": when the mouse whisked far enough forward to rule out  
195 the presence of some shapes but did not actually make contact. Together, these two variables constitute  
196 all "sampling whisks" that were sufficiently large to reach the closest possible shape position; the  
197 remaining "non-sampling whisks" could not be informative because they were too small to reach the  
198 shapes at any position. The "contact angle" feature was also useful for predicting the stimulus, likely due  
199 to the geometrical information it contains. It was less useful for predicting choice, suggesting that mice did  
200 not exploit the information despite its utility.

201

202 The remaining 28 analyzed features were relatively uninformative about choice (Supplemental Fig 3B).  
203 Notably, mechanical/kinematic variables like speed or contact-induced whisker bending, cross-whisker  
204 variables like relative timing, and task variables like choice history contained little or no information about  
205 stimulus and choice. Similarly, contact time within the trial or whisk cycle was relatively uninformative  
206 compared with the spatiotemporal "whisks with contact" feature.

207

208 We next assessed whether these features contained unique information and which features sufficed for  
209 maximal prediction accuracy by gradually adding features in decreasing order of their usefulness until the  
210 model's performance plateaued (Fig 3C). Unique information was present in whisks with contact, whisks  
211 without contact, and contact angle, and these three features together performed as well as the full model  
212 with all measured features. Therefore we used this reduced model (the "optimized behavioral decoder";  
213 dashed box, Fig 3C) for all further analyses.

214

215 This decoder accurately predicted either stimulus or choice on both correct and error trials during both  
216 detection (Fig 3D; stimulus:  $84.0 \pm 3.2\%$ ; choice:  $78.3 \pm 3.6\%$ ; mean  $\pm$  SEM) and discrimination (stimulus:  
217  $88.2 \pm 1.8\%$ ; choice:  $77.4 \pm 1.3\%$ ). It outperformed the mice on shape discrimination (Fig 3E), indicating  
218 that the mice were unable to access or use some of the information in the contact pattern.

219

220 Thus, this decoder constitutes a model of behavior capable of either identifying the stimulus or predicting  
221 the mouse's choice, even on error trials. Reflecting the mice's "tapping" strategy, this model primarily  
222 required binary information about which whiskers made contact rather than the fine temporal dynamics of  
223 those contacts.

224

## 225 **Shape detection and discrimination engage distinct motor strategies**

226 The results from classifying stimulus and choice in the shape detection task differed strikingly from shape  
227 discrimination: the total contact count summed over whiskers explained stimulus and choice better than  
228 any other variable (Fig 3B, right). Total contact count was far less informative during discrimination. This  
229 reflects the fundamental difference between these tasks: detection requires the mouse only to know that  
230 contacts occurred whereas discrimination requires additional information—most critically, the identities of  
231 the contacting whiskers.

232  
233 To test whether mice adapted their whisking strategies to the task, we asked whether shapes could be  
234 classified from the data of mice performing the shape detection task, even though these mice did not  
235 actually need to identify the shapes. We used the optimized behavioral decoder for discrimination (Fig 3C,  
236 dashed box) to predict shape identity from detection sessions. Its ability to decode shape identity during  
237 the detection task was poor compared with during the discrimination task (Fig 3F), despite the fact that the  
238 shapes in both cases were identical. Thus, mice adapt their whisking to the task at hand, collecting more  
239 information about shape identity when behaviorally relevant.

240

## 241 **Mice compare contacts across whiskers to discriminate shape**

242 Whether predicting stimulus (Fig 3G) or choice (Supplemental Fig 3C), the behavioral decoder assigned  
243 strikingly different weights to contacts made by each whisker. For shape detection, all weights were  
244 positive, meaning contact by *any* whisker indicated that a shape is present (Fig 3G, left). In sharp contrast,  
245 weights of different whiskers had opposite signs during shape discrimination (Fig 3G, right). This indicates  
246 that they conveyed opposite information: each C1 contact indicated a greater likelihood of convex whereas  
247 each C3 contact indicated a greater likelihood of concave.

248

249 Thus, mice compare contacts across whiskers to discriminate an object's curvature whereas they sum up  
250 contacts across whiskers to detect an object. Critically, this is not because any given whisker can only  
251 reach one of the shapes; all whiskers can touch both shapes (Fig 3H). Instead, the whisking strategy  
252 employed for discrimination biases contact prevalence across whiskers, which the decoder exploits to  
253 predict the mouse's choice.

254

255 To visualize this process of spatial sampling, we registered all of our whisker video into a common  
256 reference frame (Fig 3I). As expected, the whiskers reliably sampled different regions of shape space (Fig  
257 3J). Interestingly, the C1 whisker sampled the region in which contacts indicated convexity and absence of  
258 contacts indicates concavity (Fig 3K). The reverse was true for C3. The location that mice chose to sample  
259 even in the absence of contacts was also informative about their upcoming choice (Supplemental Fig 3D-  
260 F; Dominiak et al., 2019).

261

262 In summary, behavioral decoding produced a computational model of the distinct sensorimotor strategies  
263 that mice adopted in two different tasks. Inspection of the weights revealed that mice summed up contacts  
264 across whiskers to detect shapes whereas they compared contacts across whiskers to discriminate shape  
265 identity. This analysis could be used to dissect active sensation in other modalities as well.

266

## 267 **Barrel cortex neurons encode movement, contacts, and choice**

268 We next examined how barrel cortex encoded these sensorimotor events as well as cognitive variables  
269 like reward history, using an extracellular electrode array to record across all layers of cortex  
270 simultaneously (Fig 4A-D; Supplemental Video 2). We recorded 675 neurons from 7 mice performing  
271 shape discrimination and 301 neurons from 4 mice performing shape detection. Putative inhibitory  
272 interneurons were identified from their narrow waveform width (Fig 4B). Neurons with broad waveforms

273 are mostly excitatory, though a small population of inhibitory neurons are similarly broad (Bruno and  
274 Simons, 2002; Gouwens et al., 2019; Yu et al., 2019).

275  
276 Neurons exhibited rapid transient responses to whisks with contact but not to whisks without contact (Fig  
277 4E). These contact responses were stronger in the superficial layers and in inhibitory neurons, likely  
278 reflecting greater thalamocortical input to this cell type (Bruno and Simons, 2002; Cruikshank et al., 2007).  
279 Firing rates on timescales longer than the whisk cycle nevertheless tracked whisking amplitude, especially  
280 in deep inhibitory neurons (Fig 4F).

281  
282 To determine whether these neurons contained information about stimulus or choice, we used neural  
283 decoding of resampled pseudopopulations to predict stimulus and choice from the entire neural population  
284 (Methods; Rigotti et al., 2013). Stimulus and choice could be decoded with a similar timecourse and  
285 accuracy (Fig 4G, left) but, as we addressed in the behavioral analysis, this could be an artifact of the  
286 correlation between them. We therefore applied a similar approach of “balancing”, *i.e.* weighting error trials  
287 in inverse proportion to their abundance, to completely decorrelate stimulus and choice. This revealed that  
288 information about choice grows gradually throughout the trial whereas information about stimulus  
289 increases stepwise early during the trial (Fig 4G, middle).

290  
291 Finally, we asked whether this information was “local” (contained in individual whisk cycles; Isett et al.,  
292 2018) or continuous (integrated over the trial). We removed information from “sampling whisks” (those  
293 large enough to reach the shapes at their closest position) by setting the spike count to zero on those  
294 whisks, again using trial balancing to disentangle stimulus and choice. This largely abolished the encoding  
295 of stimulus but preserved the encoding of choice (Fig 4G, right), demonstrating that barrel cortex only  
296 transiently carries stimulus information during sampling whisks but encodes choice on longer timescales.

297  
298 In sum, barrel cortex neurons respond to movements and contacts on fine timescales, and cognitive  
299 variables like choice can be decoded from these neurons on broad timescales. We next sought to  
300 understand the relationship of neural activity to choices.

### 301 302 **Distributed coding of sensorimotor and cognitive variables**

303 To understand how individual neurons participate in the transformation of sensorimotor signals to  
304 decisions, we used regression to assess how they encoded local sensorimotor features and task-related  
305 features like choice. Specifically, we regressed the firing of each individual neuron onto each variable on  
306 individual whisk cycles using generalized linear models (GLMs; Fig 5A; Supplemental Fig 6A), similar to  
307 receptive field mapping by reverse correlation with natural stimuli (Park et al., 2014; Sharpee, 2013).  
308 Because neurons also encode movement and choice, this approach is needed to disentangle  
309 sensorimotor variables rather than simply attributing all responses to the presence of the shape (Fassihi et  
310 al., 2020).

311  
312 We treated the whisk as the fundamental unit of analysis rather than using arbitrary time bins because this  
313 granularity was useful for identifying behavioral strategies (Fig 3) and because contacts (Fig 2C) and  
314 spikes (Fig 4E) are highly packetized by the whisk cycle. Therefore we predicted total spike count on each  
315 whisk cycle for each neuron.

316  
317 We again used model selection to quantify the importance of each feature for predicting neural responses.  
318 Different GLMs were trained on individual families of features—contact (“whisks with contact” as above),  
319 whisking (amplitude and set point), and task-related (choice and outcome of current and previous trial)—  
320 and their goodness-of-fit (*i.e.*, accuracy with which they predicted neural responses on held-out data)



321 compared. Each family of features alone had explanatory power, and a combined “task + whisking +  
322 contacts” model surpassed any individual family (Fig 5B).

323  
324 By individually dropping each family from the “task + whisking + contacts” combined model, we were able  
325 to assess whether explanatory power was unique to each family or instead shared across families due to  
326 their correlation. In each case, this significantly lowered the goodness-of-fit (Fig 5C), indicating that each  
327 family contained some unique information. Goodness-of-fit varied widely across the population but was in  
328 general highest in inhibitory and deep-layer neurons (Fig 5D).

329  
330 Individual neurons could have been selective for specific features or broadly tuned for all features. We  
331 found that a plurality of neurons were significantly modulated by all three families (task, whisking, or  
332 contacts; Fig 5E). The results were strikingly similar across both discrimination and detection tasks. Thus,  
333 across behaviors, individual neurons in barrel cortex are broadly tuned for a mix of sensorimotor and task-  
334 related variables.

335  
336 Finally, we investigated the dynamics of task-related variables over the course of the trial. Early in the trial,  
337 neurons encoded the outcome (rewarded or unrewarded) of the previous trial (Fig 5F), even though the  
338 previous trial could have been up to 12 s prior (*e.g.*, after an error timeout). This is surprising because the  
339 behavioral analysis revealed no effect of trial history on the mouse’s choice. Later in the trial, many  
340 neurons also encoded the choice on the current trial. This timecourse was similar to that of neural  
341 decoding (Fig 4G), which could not distinguish between coding for choice *per se* versus coding for the  
342 sensorimotor signals (contacts or whisking) that might correlate with choice. The GLM analysis  
343 disentangles these variables and demonstrates that, in addition to coding for sensorimotor variables,  
344 barrel cortex neurons also code for choice and outcome, persistently and on long timescales.

### 345 346 **Cell type-specific encoding of movement and contact**

347 The tuning of individual neurons varied with cell type (excitatory or inhibitory) and laminar location  
348 (superficial or deep). The most prominent effect was that whisking strongly drove deep-layer inhibitory  
349 neurons (Fig 6A-C). Indeed, almost all ( $94 / 107 = 87.9\%$ ) inhibitory neurons in the deep layers were  
350 significantly excited by whisking (mean increase in firing rate: 23.9% per  $10^\circ$  of whisking amplitude).  
351 Excitatory neurons and superficial inhibitory neurons also encoded whisking, but were as likely to be  
352 suppressed as excited.

353  
354 In contrast, whisker contacts on the shapes more strongly excited superficial neurons, including both L2/3  
355 and L4, relative to their baselines than those in deep layers (Fig 6D-F). Suppression by contact was less  
356 frequent than excitation in all cell types. Thus, movement and contact appear to have their greatest impact  
357 on the deeper and superficial layers, respectively.

### 358 359 **Contact responses are dominated by whisker identity, not finer sensorimotor parameters**

360 We next asked which features of these contacts drove neurons and how this related to shape  
361 discrimination. Barrel cortex is arranged topographically with neurons in each cortical column typically  
362 responding to the corresponding whisker. Therefore preference for specific whiskers (somatotopy) was a  
363 clear candidate, but barrel cortex neurons are also tuned for multiple whiskers, contact force, whisking  
364 phase, cross-whisker timing, and global coherence, among other features (Brumberg et al., 1996; Drew  
365 and Feldman, 2007; Ego-Stengel et al., 2005).

366  
367 Feature importance was assessed by comparing the goodness-of-fit of GLMs that had access to each  
368 feature. Whisker identity (which whisker made contact) was the most critical element determining neural

369 firing (Fig 6G). The exact kinematics of contacts were less important. Of all the kinematic parameters we  
370 considered, contact force explained the most neural activity, but even this effect was relatively small  
371 compared to whisker identity.

372  
373 We considered the possibility that some alternative kinematic feature that was not measured (e.g., due to  
374 limitations in viewing angle or frame rate) might be driving neural activity. We therefore fit a model that  
375 also included the identity of the shape (concave or convex) on which each contact was made. If any  
376 unmeasured kinematic feature drove neural activity differently depending on the stimulus, this feature  
377 should capture some neural variability. Instead, it only slightly improved the model (Fig 6G), even less  
378 than including whisker bending (which did not strongly differ between the stimuli). This rules out, at least in  
379 a GLM framework, a latent variable that differentiates the stimuli and strongly drives neural activity.

380  
381 Thus, during shape discrimination, contact responses are mainly driven by the identity of the whisker  
382 making contact. This was also the key feature for decoding stimulus and choice from the behavioral data,  
383 suggesting that contact responses might be dynamically modulated by task demands.

384

### 385 **Task-specific representation of contacts**

386 Given that the identity of the contacting whisker was so critical for explaining neural responses, we  
387 examined each neuron's tuning using the weights that the GLM assigned to each whisker. Neurons were  
388 spatially tuned, exhibiting whisker preferences (Supplemental Fig 6B,C). We did not select for responsive  
389 neurons, but rather included all neurons for which we had at least 10 contacts from each whisker.

390

391 During shape detection, the population of recorded neurons as a whole responded nearly equally to  
392 contacts made by C1, C2, and C3 (Fig 6H, left). Individual neurons could prefer any of the three whiskers,  
393 and in keeping with the somatotopy of barrel cortex, superficial neurons tended to prefer the whisker  
394 corresponding to their cortical column (Supplemental Fig 6D).

395

396 In marked contrast, we observed a widespread and powerful bias during shape discrimination: at the  
397 population level, neurons responded much more strongly to C1 contacts than to contacts by C2 or  
398 especially C3 (Fig 6H, right). Neurons preferring C1 were more prevalent in all cell types and in all  
399 recording locations, including the C2 and C3 cortical columns (Supplemental Fig 6E,F; individual neurons  
400 in Fig 6I). In an apparent violation of somatotopic organization, neuronal preference across columns was  
401 dominated by C1 regardless of the anatomical location. Because this preference was specific to the  
402 discrimination task, it could not be a trivial artifact of the shape stimuli or our analysis. Thus, whisker  
403 tuning was task-specific and strong enough to override somatotopy.

404

### 405 **Whisker-specific tuning explains the population choice signal**

406 This somatotopic remapping during shape discrimination corresponds with the different weights assigned  
407 to each whisker by the behavioral classifiers (Fig 3G; C1 indicates convex). This correspondence  
408 suggests that neurons are retuned to C1 contacts in order to promote convex choices. It would have been  
409 equally plausible for neurons to prefer C3 contacts in order to promote concave choices, but this was not  
410 observed. This mirrors our behavioral observation (Fig 1G) that mice seemed to rely on a "convexity  
411 detection" strategy (*cf.* the "yes/no" tasks in Jang et al., 2009; Schulman and Mitchell, 1966).

412

413 We asked whether neurons' choice preferences could be explained by their whisker tuning. Specifically,  
414 we assessed the tuning of two subpopulations of neurons preferring either concave or convex choices  
415 (*i.e.*, those assigned positive or negative weights by the decoder in Fig 4G). Indeed, the convex-preferring  
416 subpopulation strongly preferred C1 contacts (Fig 6J, red bars).

417

418 In summary, our neural encoder model (Fig 5-6) explains how the neural decoder (Fig 4G) was able to  
419 predict stimulus and choice: neurons were tuned for sensory input that the mouse had learned to  
420 associate with convex shapes. These representations were task-specific (Fig 6H) and could not be  
421 explained solely by simple geometrical aspects of the stimuli or whiskers. Indeed, the representations  
422 match weights used by the behavioral decoders to identify shapes. Our results link the tuning of individual  
423 neurons for fine-scale sensorimotor events to the more global and persistent representations of shape and  
424 choice. This bridging of local features to global identity is the essential computation of shape recognition.

## 425 **Discussion**

426 In this study, we developed a novel head-fixed shape discrimination behavioral paradigm. Mice  
427 accomplished this task by comparing contacts made across whiskers. Barrel cortex neurons exhibited  
428 distributed coding of sensory, motor, and task-related signals. Deep inhibitory neurons encoded motion  
429 signals, and all neurons coded for contacts with a bias toward the whisker (C1) that preferentially  
430 contacted convex shapes. In mice performing shape detection, we observed similar coding of exploratory  
431 motion signals and of choice and outcome-related signals, but not the somatotopic bias. Thus, the barrel  
432 cortex relies partly on computational principles that are shared across tasks, and partly on task-specific  
433 coding that permits readout of behaviorally relevant variables.

434

### 435 **Behavioral decoding reveals sensorimotor strategies**

436 Understanding neural mechanisms and computations begins with defining the subject's behavioral goals  
437 and elucidating its strategy for achieving them (Krakauer et al., 2017; Marr and Poggio, 1976). Our  
438 approach was to measure many sensorimotor parameters about how mice interacted with the shapes and  
439 then to use behavioral decoding to predict the stimulus and choice from these data. This agnostic  
440 approach allowed us to rule out variables that contained little or no relevant information, identify from  
441 weights how animals interpreted informative variables, and form hypotheses for interpreting the neural  
442 data. We probed only one aspect of shape discrimination here, but this approach may easily be extended  
443 to other objects and tasks.

444

445 In two-alternative and go/nogo tasks stimulus and choice are correlated, especially when the subject's  
446 accuracy is high. We disentangled stimulus and choice through trial balancing—overweighting incorrect  
447 trials so that in aggregate they are weighted the same as correct trials. This was crucial for interpreting the  
448 behavior. Some variables, such as contact count, were important for both stimulus and choice, indicating  
449 they were useful and actually used by the mouse. Others, such as contact angle, were more useful for  
450 predicting stimulus than choice, suggesting that mice did not (or could not) effectively exploit it. This effect  
451 is likely due to the incomplete information mice have about the instantaneous location of the whisker tips  
452 (Fee et al., 1997; Hill et al., 2011; Moore et al., 2015; Severson et al., 2019).

453

454 There are other approaches to disentangling stimulus and choice: separately fitting correct and incorrect  
455 trials, comparing stimulus prediction with choice, *etc.* (Campagner et al., 2019; Isett et al., 2018;  
456 Waiblinger et al., 2018; Zuo and Diamond, 2019a). We prefer trial balancing because it jointly optimizes  
457 over correct and incorrect trials. Regardless of the method chosen, the correlation between stimulus and  
458 choice must be considered, both in behavioral strategy analysis and in neural decoding.

459

### 460 **Mice compare contact counts across whiskers to discriminate shape**

461 Shape discrimination fundamentally differs from pole localization and texture discrimination because it  
462 explicitly requires integration over different regions of space. Thus, comparing input across whiskers was a

463 reasonable strategy for mice to pursue. Although mice can perform other tasks better with multiple  
464 whiskers (Carvell and Simons, 1995; Celikel and Sakmann, 2007; Knutsen et al., 2006; O'Connor et al.,  
465 2010a), those cases likely reflect statistical pooling of similar information from multiple sensors as in our  
466 shape detection control task (Krupa et al., 2001).

467

468 Our results go beyond statistical pooling. We are not aware of any published examples of mice assigning  
469 opposite behavioral meaning to input from different nearby whiskers. This strategy more closely captures  
470 the way primates compare across fingers when grasping objects (Davidson, 1972; Thakur et al., 2008)  
471 and suggests key roles for cross-columnar integration in somatosensory cortex (Petreanu et al., 2012;  
472 Thakur et al., 2012).

473

474 For shape discrimination, the identity of the contacting whiskers was the most important feature  
475 determining both behavioral choice and neural responses. Although cross-whisker timing has been  
476 hypothesized to be an important parameter for shape discrimination (Benison et al., 2006; *cf.* primate  
477 fingertips in Johansson and Flanagan, 2009), it was uninformative about shape in our task. This may be  
478 because whisker mechanics (“floppiness”) during movement add too much variability to cross-whisker  
479 contact latency. It has also been proposed that the pattern of forces over the whisker array as they “grasp”  
480 an object could be informative about shape (Bush et al., 2016; Hobbs et al., 2016a). We did not observe  
481 whisker bending to be particularly informative, but finer measurements of the moments and forces at the  
482 follicle may shed light on this (Yang and Hartmann, 2016).

483

484 In sum, we find that whisker identity during contact alone to be the critical parameter for shape  
485 discrimination. We cannot exclude the possibility that mice employed this strategy because we had  
486 trimmed off the other rows of whiskers, but a similar observation has been made in freely moving rats with  
487 all of their whiskers (Hobbs et al., 2016b), albeit not during goal-directed behavior.

488

### 489 **Efficient motor exploration strategies simplify the sensory readout**

490 Reflecting this difference in strategy, mice interacted with the shapes in a fundamentally different way than  
491 in many previous tasks. In our task, mice lightly tapped the stimuli with the tips of multiple whiskers  
492 simultaneously. This “minimal impingement” approach (Mitchinson et al., 2007) is likely the natural mode  
493 of the whisker system (Grant et al., 2009; Ritt et al., 2008). Multiple light touches could also engage  
494 adaptation circuits within the somatosensory pathway, enhancing their ability to perform fine discrimination  
495 (Wang et al., 2010). In contrast, mice locate and detect poles by contacting them with high enough force to  
496 cause substantial whisker bending (Hong et al., 2018; Pammer et al., 2013). This likely amplifies the  
497 corresponding neural signal, an efficient strategy for detection (Campagner et al., 2016; O'Connor et al.,  
498 2010b; Ranganathan et al., 2018) though perhaps more useful for nearby poles than for surfaces.

499

500 A common thread running through the entire literature of whisking behavior is that animals learn a motor  
501 exploration strategy optimized for the task at hand: targeting whisking to a narrow region of space to  
502 locate objects (Cheung et al., 2019; O'Connor et al., 2010a), rubbing whiskers along surfaces to generate  
503 the high-acceleration events that correlate with texture (Isett et al., 2018; Jadhav et al., 2009; Schwarz,  
504 2016), or targeting contacts to specific whiskers in the present work. Thus, animals pursue a motor  
505 strategy that simplifies the sensory readout, *e.g.* to a threshold on spike count (O'Connor et al., 2013).  
506 Performance is consequently limited by errors in motor targeting rather than in sensory detection (Cheung  
507 et al., 2019). Similarly, humans learn efficient motor strategies for directing gaze and grasp (Gamzu and  
508 Ahissar, 2001; Yang et al., 2016b).

509

510 The challenge of these tasks may lie in learning a skilled action that enhances active perception rather  
511 than in drawing fine category boundaries through sensory representations as in classical perceptual  
512 learning. Behavior may thus be considered a motor-sensory-motor sequence combining purposive  
513 exploration and sensory processing to guide further actions (Ahissar and Assa, 2016).

514

### 515 **Timescales of integration in barrel cortex and beyond**

516 At the sensory periphery neurons encode moment-to-moment sensory input whereas high-order brain  
517 structures encode object identity persistently and often with spatial invariance. Barrel cortex, an  
518 intermediate stage in this process, can be driven by extreme <5 ms synchrony (Bruno and Sakmann,  
519 2006), the previous ~50 ms of sensory input (Bale and Maravall, 2018; Fassihi et al., 2020; Ramirez et al.,  
520 2014), whisker motor movements at ~100 ms (Fee et al., 1997), and even task-related features like reward  
521 over >1 s timescales (Lacefield et al., 2019).

522

523 Barrel cortex is thus well-situated to bind precise sensory information to longer-lasting internal states.  
524 Rather than generating decisions *per se*, its role may be to format sensorimotor information in a task-  
525 specific way, furnishing the results to downstream areas like secondary somatosensory cortex, primary  
526 motor cortex, parietal cortex, or striatum (Chen et al., 2013; Mohan et al., 2019; Sippy et al., 2015; Yang et  
527 al., 2016a; Zuo and Diamond, 2019b). In support of this formatting hypothesis, we find that neurons  
528 encode short-timescale events like contacts and whisks, but that decoders can also read out stimulus  
529 identity and choice over the course of the trial.

530

531 Previous trial outcome, which had little effect on the mouse's choice, prominently modulated neural  
532 activity. This could reflect arousal or a long-lasting effect of reward (Lacefield et al., 2019; McGinley et al.,  
533 2015; Vinck et al., 2015). Persistent representations of choice and outcome have been observed in  
534 prefrontal, parietal, and motor cortex; the thalamus; and indeed throughout the brain (Akrami et al., 2018;  
535 Hattori et al., 2019; Lavzin et al., 2020; Nogueira et al., 2017; Tsutsui et al., 2016; Waiblinger et al., 2018).  
536 Recent work in artificial neuronal networks suggests that distributed outcome signals may be a general  
537 principle of reinforcement learning (Dabney et al., 2020).

538

### 539 **Motor signals in barrel cortex**

540 In natural behavior, active sensing is the norm: animals explore by moving their heads, eyes, and ears and  
541 by sniffing, chewing, or grasping objects. Motor signals should perhaps be expected in sensory areas  
542 because they provide context for interpreting sensory input. We found that movement was generally the  
543 largest signal in barrel cortex activity, stronger even than responses to whisker contacts. Recent studies  
544 have variously found that barrel cortex neurons respond to whisking onset (Muñoz et al., 2017; Yu et al.,  
545 2016), that whisking phase modulates contact responses (Curtis and Kleinfeld, 2009; Hires et al., 2015),  
546 or that whisking simply has mixed effects on neuronal firing (Ayaz et al., 2019; O'Connor et al., 2010b;  
547 Peron et al., 2015). Technical limitations of whisker tracking perhaps explain these disparate results  
548 (Krupa et al., 2004).

549

550 In resolving this, we found that multiple features of whisking are encoded simultaneously: whisking set  
551 point and amplitude (global signals shared across whiskers) and whisking pose (the relative angle of each  
552 whisker to the others, *cf.* hand posture in Goodman et al., 2019). This encoding was widespread but with a  
553 strong cell type-specific bias: inhibitory neurons in the deep layers were robustly and consistently excited  
554 in proportion to whisking amplitude. This is consistent with studies of parvalbumin-positive neurons in layer  
555 4 and 5B/6 (Yu et al., 2016), as well as in other classes of inhibitory interneurons throughout all layers  
556 (Muñoz et al., 2017; Yu et al., 2019). However, these studies focused on responses around whisking  
557 onset rather than the continuous and graded encoding of whisking that we describe here.

558

559 One theory is that whisker motion should be encoded in inhibitory signals so that the brain can predict and  
560 account for the sensory consequences of movement (Yu et al., 2016), as in the auditory cortex (Schneider  
561 et al., 2018). The inhibitory neurons of the deep layers receive direct input from primary motor cortex  
562 (Kinnischtzke et al., 2014) and can potently suppress the entire cortical column (Bortone et al., 2014;  
563 Frandolig et al., 2019). A subtraction could account for simple stimuli, but increasingly complex stimuli like  
564 shapes may require mixed selectivity and distributed coding of sensorimotor signals (Rigotti et al., 2013).  
565 This perhaps explains the diverse tuning for whisking that we observed in excitatory neurons.

566

567 More generally, whisker motion signals may be analogous to the preparatory saccade signals identified in  
568 visual cortex. The brain may exploit the synchronization and discretization of sensory signals to make  
569 judgments about the external world. Like whisking, saccades are a motor action directed toward collecting  
570 information, and the cortex predicts the resulting change in sensory input (Steinmetz and Moore, 2010).

571

### 572 **Barrel cortex formats contact representations for reading out shape**

573 At first glance, the whisker system may appear to be a labeled line system due to its somatotopic  
574 organization at the level of the brainstem, thalamus, and cortex. Indeed, neurons in thalamorecipient layer  
575 4 typically respond best to stimulation of an anatomically corresponding whisker. However, outside of L4  
576 the preference for any particular whisker is much weaker (Brecht et al., 2003; Clancy et al., 2015; Jacob et  
577 al., 2008; De Kock et al., 2007; Peron et al., 2015; Pluta et al., 2017; Ramirez et al., 2014), and indeed  
578 attending to whisker input decreases somatotopy (Wang et al., 2019).

579

580 Rather than maintaining a labeled-line code, the barrel cortex may encode multi-whisker sequences, a  
581 map of scanned space, or entire tactile scenes (Laboy-Juárez et al., 2019; Pluta et al., 2017; Vilarchao et  
582 al., 2018; reviewed in Estebanez et al., 2018). Similarly, auditory cortex is now thought to encode high-  
583 level sound features rather than strict tonotopy (Bandyopadhyay et al., 2010; Carcea et al., 2017;  
584 Rothschild et al., 2010). Ethologically, integrating information across sensors would seem far more useful  
585 than maintaining in higher-level areas a strict segregation based on peripheral organization. In keeping  
586 with this, we observed a substantial diversity across individual neurons in their tuning for contacts by each  
587 whisker, and an over-representation of behaviorally relevant whiskers during shape discrimination.

588

### 589 **Task-specific coding for efficient sensorimotor identification**

590 We suggest that the barrel cortex learns to code preferentially for the sensory features that are most  
591 relevant for the animal's goals (Ramalingam et al., 2013). In shape discrimination, mice learned to  
592 compare the space sampled by the C1 whisker with the space sampled by the C3 whisker. One way to  
593 "detect convex" shapes is to preferentially enhance C1 contacts (overrepresented on convex shapes) and  
594 suppress C3 contacts, essentially implementing a cross-whisker subtraction. Thus the neural responses to  
595 contacts are reweighted to permit the detection of convexity. This computation relies on both a motor  
596 strategy (targeting contacts on each shape to specific whiskers) and a neural coding mechanism  
597 (enhancing responses to contacts on specific whiskers). Further studies are needed to assess the degree  
598 to which neural mechanisms depend on local plasticity versus descending input from higher areas.

599

600 One intriguing possibility is that these computations may be related to efficient coding. Within the  
601 timescale of a single trial, mice may refine increasingly accurate models of the shape, as they learn to  
602 predict future sensory input from earlier input in the trial. In turn, they could adopt exploratory motion  
603 strategies to test their current prediction. These prediction signals are thought to be represented by  
604 different cortical layers (reviewed in Adesnik and Naka, 2018), and deficits in predictive coding have been

605 hypothesized to explain the differences in the autistic and schizophrenic brains (Keller and Mrcic-Flogel,  
606 2018; Robertson and Baron-Cohen, 2017).

607

608 The superficial and deep layers of cortex can encode sensory stimuli independently (Constantinople and  
609 Bruno, 2013) but they can also strongly interact (Pluta et al., 2019). We observed stronger touch  
610 responses in the superficial layers and stronger whisking responses in the deep layers, potentially useful  
611 for simulating the effects of motor exploration (Brecht, 2017). The superficial layers may also encode  
612 mismatch signals like unexpected contacts (Keller et al., 2012; although *cf.* Ayaz et al., 2019). Further  
613 work will be necessary to determine how and when this translaminar circuit implements active sensation.

614

615 Although the details of these effects are specific to this task and stimulus geometry, we suggest that  
616 analogous computations in other brain areas and species could implement object recognition by  
617 comparing input across different sensors in the context of exploratory motion. Recent results have  
618 demonstrated an unexpectedly widespread coding for motion across the brain (Musall et al., 2019;  
619 Stringer et al., 2019). These motion signals could be critical for interpreting sensory input in the context of  
620 behavioral state. The common structure of cortex across regions of disparate functionality (Douglas and  
621 Martin, 2004) may be a signature of this common computational goal.

## 622 **Author Contributions**

623 CR, SF, and RB conceived of the experiments and analytic approach. CR developed the behavior with  
624 help from EG and BCP who also assisted in training the mice. CR and EG performed videography. CR  
625 built the electrophysiological recording rig, performed all electrophysiological recordings, and coded the  
626 videographic and electrophysiological analyses. RN and SF provided insight and guidance on the  
627 theoretical concepts and analytic approach. CR and RN analyzed data and CR generated the final  
628 versions of analyses and figures presented here. CR, RN, SF, and RB together decided how to interpret  
629 the data. CR wrote and RN, SF, and RB edited the manuscript.

630  
631 The authors declare no competing interests.

## 632 **Acknowledgements**

633 We thank Akash Khanna and Philip Calafati for help with mouse training; Drew Baughman for histological  
634 assistance and lab management; Clay Lacefield for early assistance with behavioral apparatus; Jung M  
635 Park for assistance with building behavioral apparatus, mouse training, and perfusions; Richard Warren  
636 for help with whisker tracking algorithms; Caroline Bollen for assistance with microscopy; Brian Isett for  
637 advice on longitudinal acute recording technique; Michael Shadlen and Anita Devineni for comments on  
638 the manuscript; and the members of the Center for Theoretical Neuroscience for insightful suggestions.

639  
640 Support was provided by NINDS/NIH (R01NS094659, F32NS096819, and U01NS099726); NeuroNex  
641 (DBI-1707398); the Gatsby Charitable Foundation (GAT3419); a Kavli Institute for Brain Science  
642 postdoctoral fellowship (to CR); and a Brain & Behavior Research Foundation Young Investigator Award  
643 (to CR).

644  
645 The content is solely the responsibility of the authors and does not necessarily represent the official views  
646 of the NIH.



647

## Figures (with legends)

648

### Figure 1. Mice learned either a shape discrimination or a shape detection task.

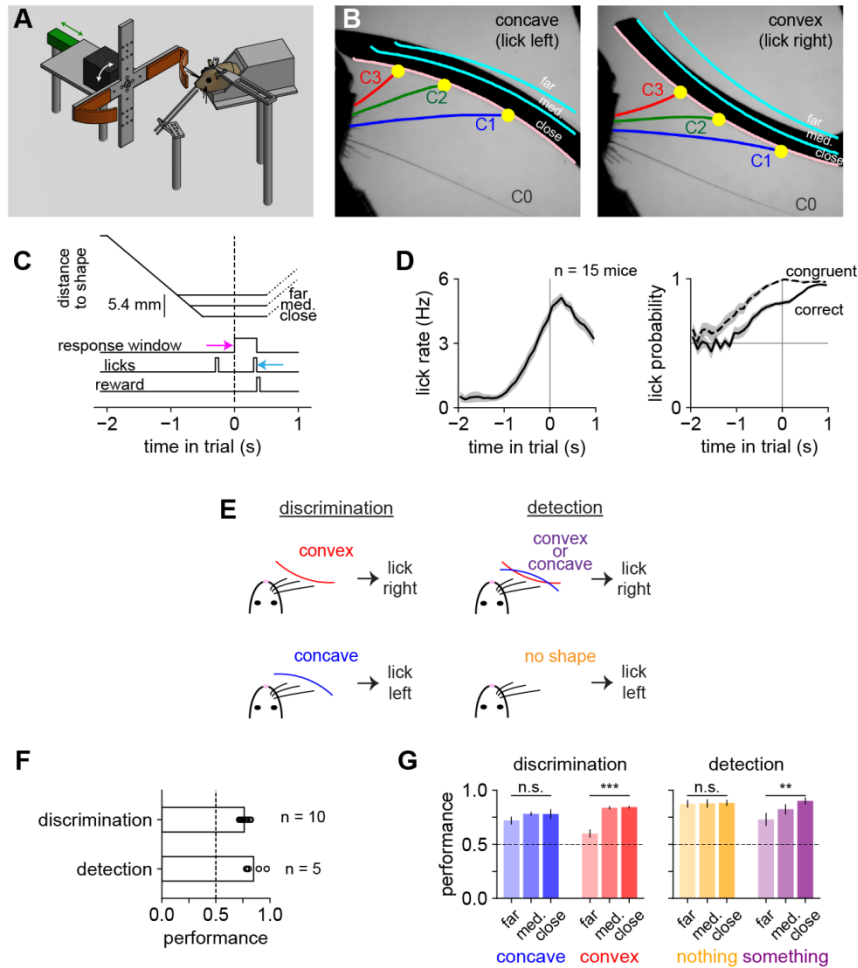

649

650 **A)** Diagram of the behavioral apparatus. A motor (black) rotated a shape (orange) into position, and a linear actuator (green)

651 moved it into the whisker field. Mice reported choice by licking left or right pipes.

652 **B)** Example high-speed video frames. Shapes were presented at one of three different positions (pink and cyan lines labeled

653 close, medium, and far). We tracked whiskers C0 ( $\beta$  or  $\gamma$ ), C1, C2, and C3.

654 **C)** Trial timeline. At  $t = -2$  s, the linear actuator began moving the shape toward the mouse's whisker field and reached its final

655 position between  $t = -1.0$  and  $-0.5$  s. The response window opened at  $t = 0$  s (pink arrow) and ended at the "choice lick" (cyan

656 arrow).

657 **D)** *Left*: the total lick rate (regardless of lick direction). *Right*: the probability that licks were correct (solid line) or congruent

658 with the choice lick (dashed line). Correct licks increased with trial feedback (correct or incorrect) after  $t = 0$  s.

659 **E)** Task rules. Mice trained on shape discrimination licked right for convex and left for concave shapes. Mice trained on shape

660 detection licked right for either shape and left on trials when no shape is presented.

661 **F)** Mouse performance (fraction of correct trials) on both tasks exceeded chance (dashed line).

662 **G)** Mouse performance by task, stimulus, and position. On the "nothing" condition, the actuator moves to the correct position, but

663 no shape is present. Performance significantly improves with proximity on convex shapes during discrimination and on any

664 shape during detection (one-way repeated-measures ANOVA).

665

666 Throughout the manuscript: \*  $p < 0.05$ ; \*\*  $p < 0.01$ ; \*\*\*  $p < 0.001$ .

667 Error bars: SEM over mice.

668

669

## Figure 2. Mice employ brief taps with multiple whiskers to discriminate shape.

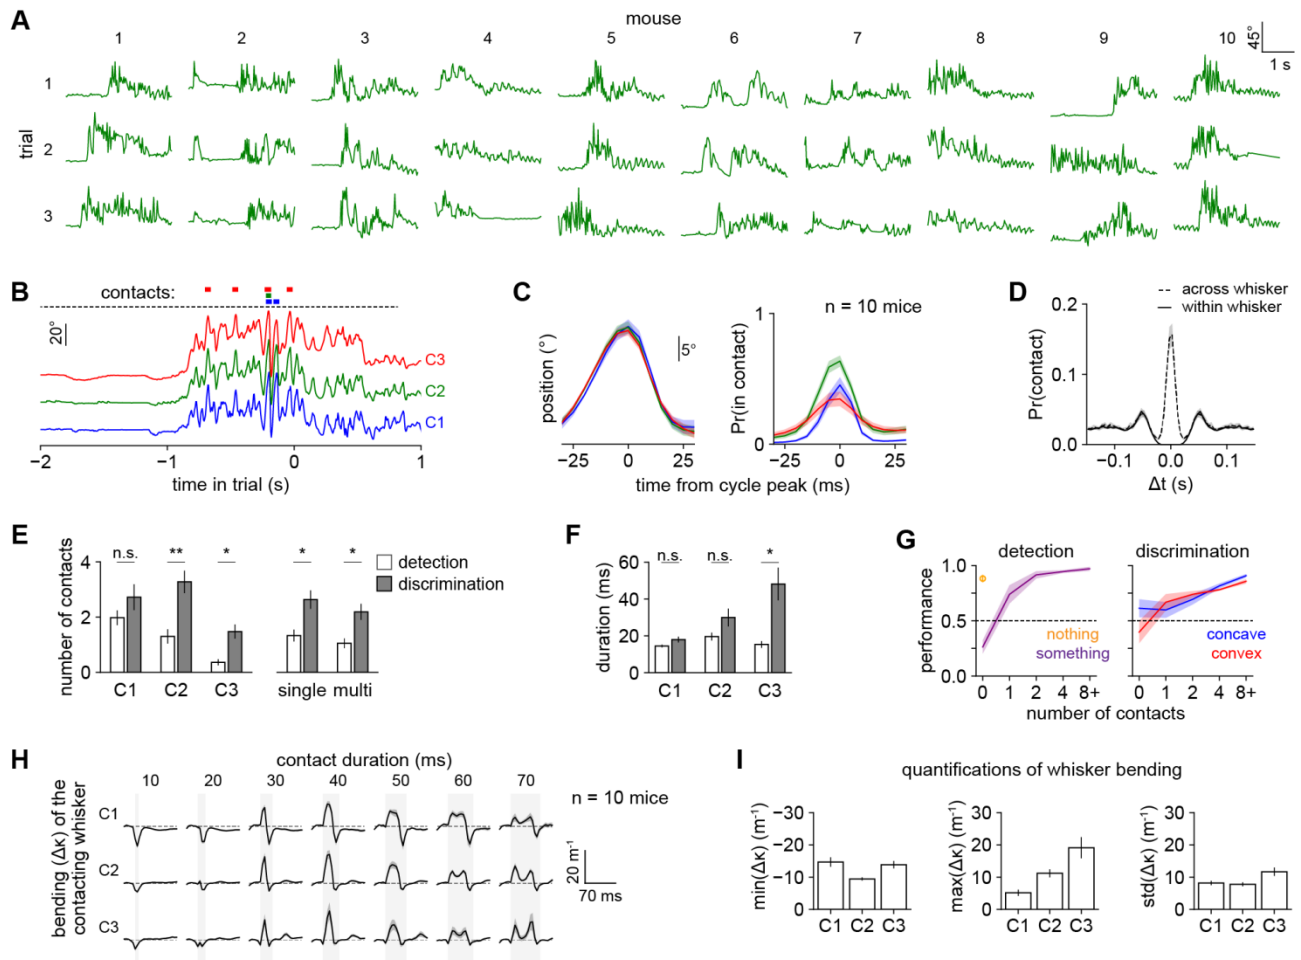

670

671

672

673

674

675

676

677

678

679

680

681

682

683

684

685

686

687

688

689

690

691

- A)** Angular position of the C2 whisker on three representative correct trials from ten mice performing shape discrimination.
- B)** Angular position of C1, C2, and C3 over a single trial using timescale defined in Fig 1C. Colored bars: whisker contacts.
- C)** *Left*: mean angle of each whisker aligned to the C2 whisk cycle peak. *Right*: probability that each whisker was in contact, aligned to the same time axis as on left. For both,  $n = 94,999$  whisk cycles during which  $\geq 1$  whisker made contact.
- D)** Autocorrelation of contact times within each whisker (solid) and cross-correlation of contact times across pairs of adjacent whiskers (dashed), expressed as probability of contact at each lag.
- E)** *Left*: the mean number of contacts made by each whisker during both tasks. Discrimination mice made significantly more contacts with C2 and C3 than detection mice did. *Right*: Discrimination mice made significantly more contacts with a single whisker alone and with multiple whiskers simultaneously than detection mice did (two-sample t-test).
- F)** Mean duration of contacts in panel E. C3 contacts are significantly longer during discrimination (two-sample t-test).
- G)** Performance versus the number of contacts in the detection (left) or discrimination (right) task. Multi-whisker contacts were counted as a single contact event. Orange circle: trials during detection when no shape is present. We excluded mice from any bin in which they had  $< 10$  trials.
- H)** Mean whisker bending ( $\Delta\kappa$ ) over time during each contact aligned to its onset and relative to the pre-contact baseline (dashed line), plotted separately for each whisker (row) and contact duration (column). Shaded area: duration of contact. Not all mice made contacts of all possible durations; data points with  $< 10$  contacts per mouse were excluded.
- I)** Whisker bending quantified as the minimum, maximum, and standard deviation of  $\Delta\kappa$  over the duration of each contact.

Error bars: SEM over mice.

All panels include 10 discrimination mice. E-G also include 5 detection mice.

691

692

**Figure 3. Mice compare contacts across whiskers in order to determine shape.**

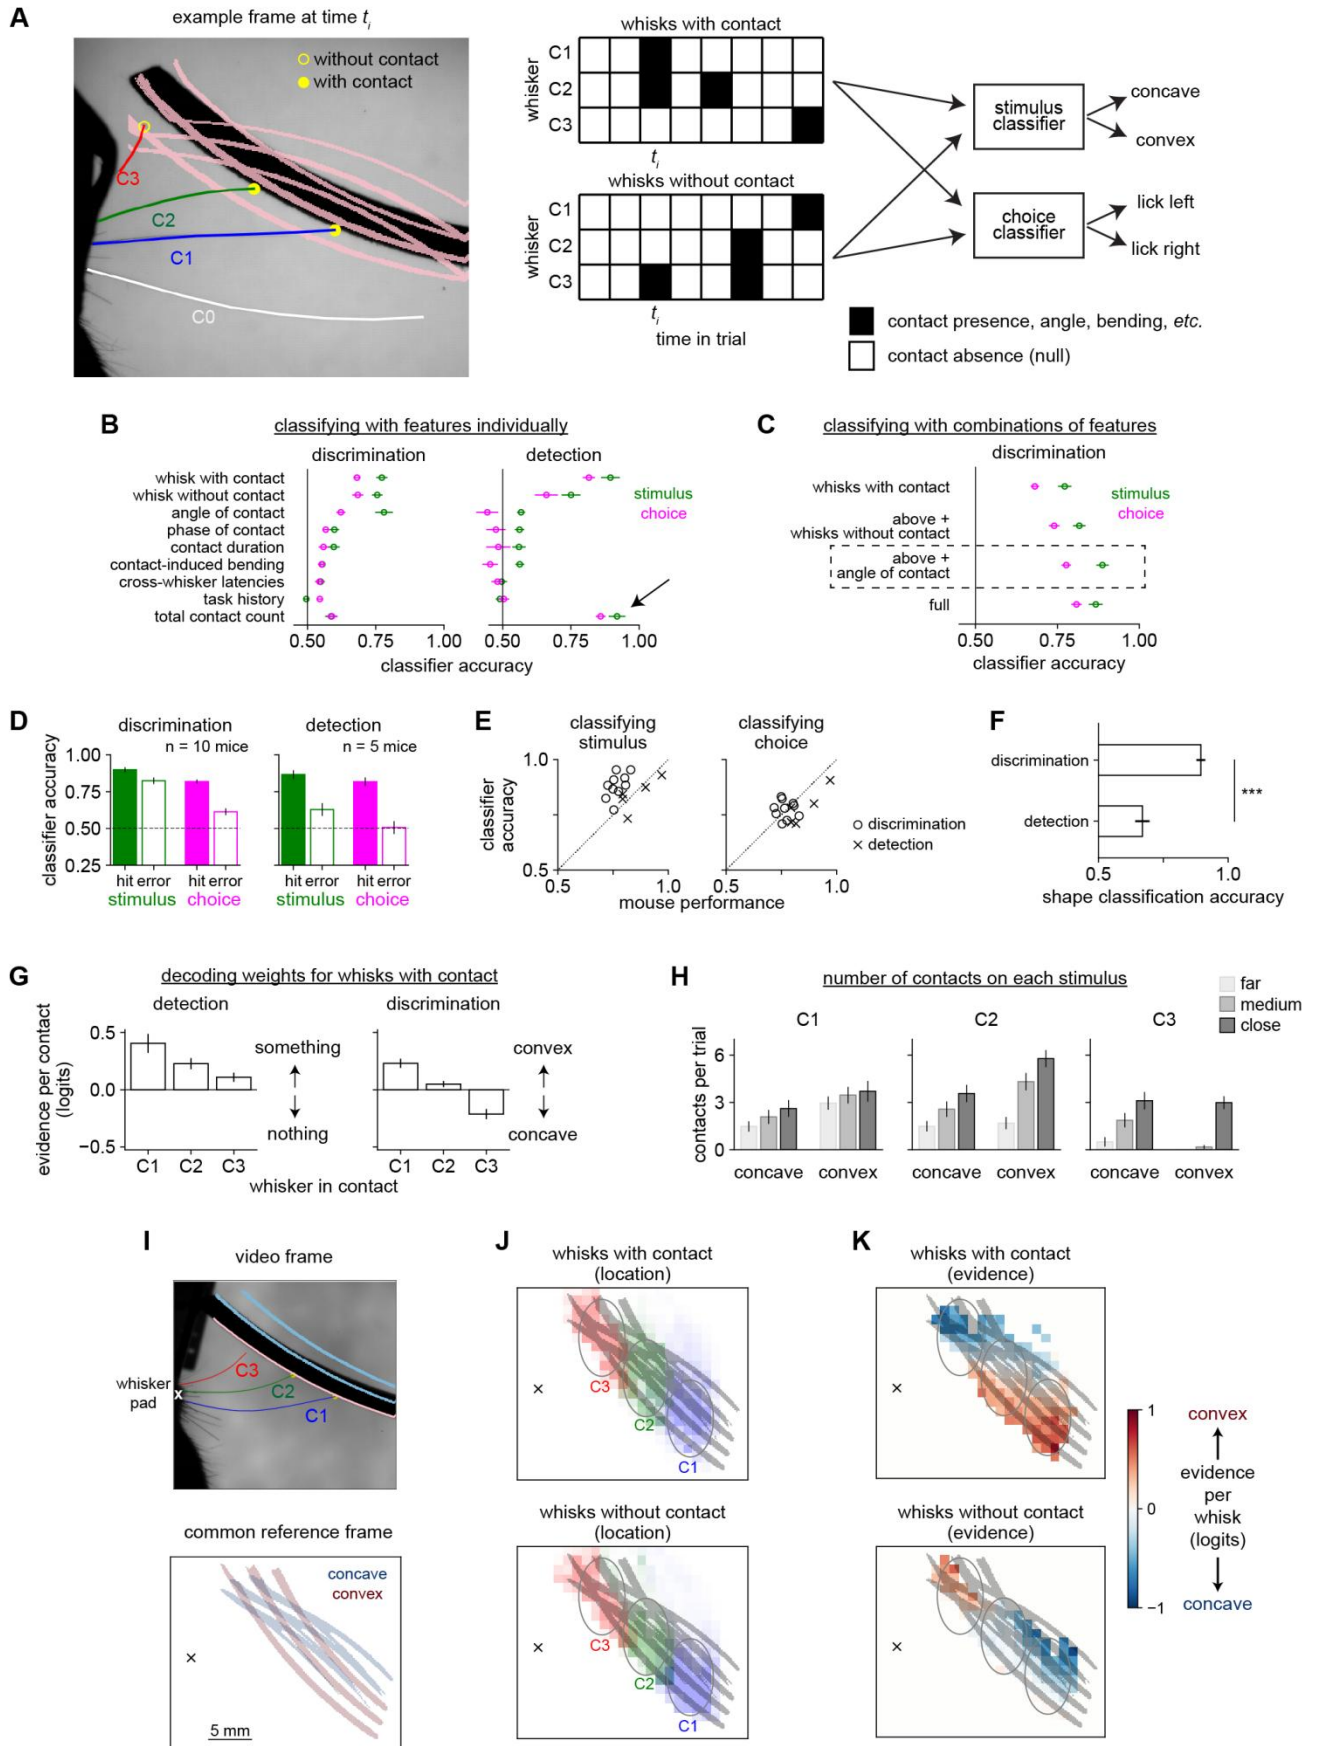

693

694

695

**A)** A large suite of behavioral features was used to train behavioral decoders to predict the stimulus (concave or convex) or choice (direction of choice lick). *Left:* Example frame showing the peak of a whisk in which whiskers C1-C3 protracted far

696 enough to reach the shapes at some positions (pink lines). In this example, C1 and C2 were scored as “with contact” and C3  
697 as “without contact”. All three are considered “sampling whisks” because they protracted far enough to reach the shapes at  
698 their closest position. *Middle*: Features were extracted into sparse two-dimensional arrays of whisker (rows) versus 250 ms  
699 time bins (columns). Black squares indicate a whisk with contact (top) or without contact (bottom). Features could be binary  
700 (e.g., contact by a specific whisker) or continuous (e.g., angle or force). *Right*: Logistic regression classifiers predicted  
701 stimulus or choice.

702 **B)** Feature importance quantified by the accuracy of a behavioral decoder trained on that feature alone to identify stimulus  
703 (green) or choice (pink). During shape detection (right), the total number of contacts (black arrow) was the most informative  
704 feature; this same parameter was much less useful during discrimination.

705 **C)** Accuracy of decoders trained on combinations of features: first whisks with contact only, then also including whisks without  
706 contact, then including angle of contact, then including all features in the entire dataset. The third model (dashed box,  
707 “optimized behavioral decoder”) is used for the remainder of this figure, because it performs as well as the full model while  
708 using far fewer features.

709 **D)** The optimized behavioral decoder predicts stimulus (green) and choice (pink) well during both shape discrimination and  
710 detection. Filled bars: correct trials; open bars: incorrect trials.

711 **E)** Accuracy of the decoder (y-axis) versus performance of each mouse (x-axis) when decoding the stimulus (left) or choice  
712 (right) during discrimination (circles) or detection (X’s). The decoder identifies stimulus (left panel) significantly more  
713 accurately than the mouse does (left panel) during discrimination ( $p < 0.001$ , paired t-test) but not during detection ( $p > 0.05$ ).

714 **F)** Accuracy of decoders trained to distinguish concave from convex shapes using data from shape discrimination (top) or shape  
715 detection (bottom) tasks. The decoders were significantly more able to identify shape during discrimination ( $p < 0.001$ ,  
716 unpaired t-test), indicating that the whisking strategy mice employed for shape discrimination extracted more information  
717 about the shape’s identity.

718 **G)** The weights assigned by the decoder to the “whisks with contact” feature, separately plotted by which whisker made contact.  
719 Weights were relatively consistent over the trial timecourse (data not shown) and are averaged over time here for clarity.  
720 They are expressed as the change in log-odds (logits) per additional contact.

721 **H)** The mean number of contacts per trial for each whisker during shape discrimination, separately by shape identity (concave or  
722 convex) and position (far, medium, or close indicated by shading; cf. Fig 1B). Although each whisker may touch one shape or  
723 the other more frequently, no whisker touches a single shape exclusively.

724 **I)** Videos for all sessions and mice were registered into a common reference frame based on shape positions. *Top*: single frame  
725 showing whisker identity and location of whisker pad for reference. *Bottom*: location of the concave (blue) and convex (red)  
726 shapes in the common reference frame, with average location of whisker pad marked.

727 **J)** Location of the peak of each whisk with contact (top) or without contact (bottom) in the common reference frame. Each  
728 whisker (C1, C2, and C3; blue, green, and red) samples distinct regions of shape space (gray ovals).

729 **K)** The same data from panel (J), but now colored by their strength of the evidence about shape (red: convex; blue: concave)  
730 using the decoder weights. *Top*: C1 (C3) contacts occur in a region that is more likely to contain a convex (concave) shape.  
731 *Bottom*: On whisks without contact, the mapping between whisker and shape identity is reversed. Note that the sampled  
732 areas can contain either shape, so sampling one area alone is not sufficient to perform the task.

733

734 Error bars: SEM over mice.

735 **Figure 4. Barrel cortex neurons respond to whisking and contacts.**

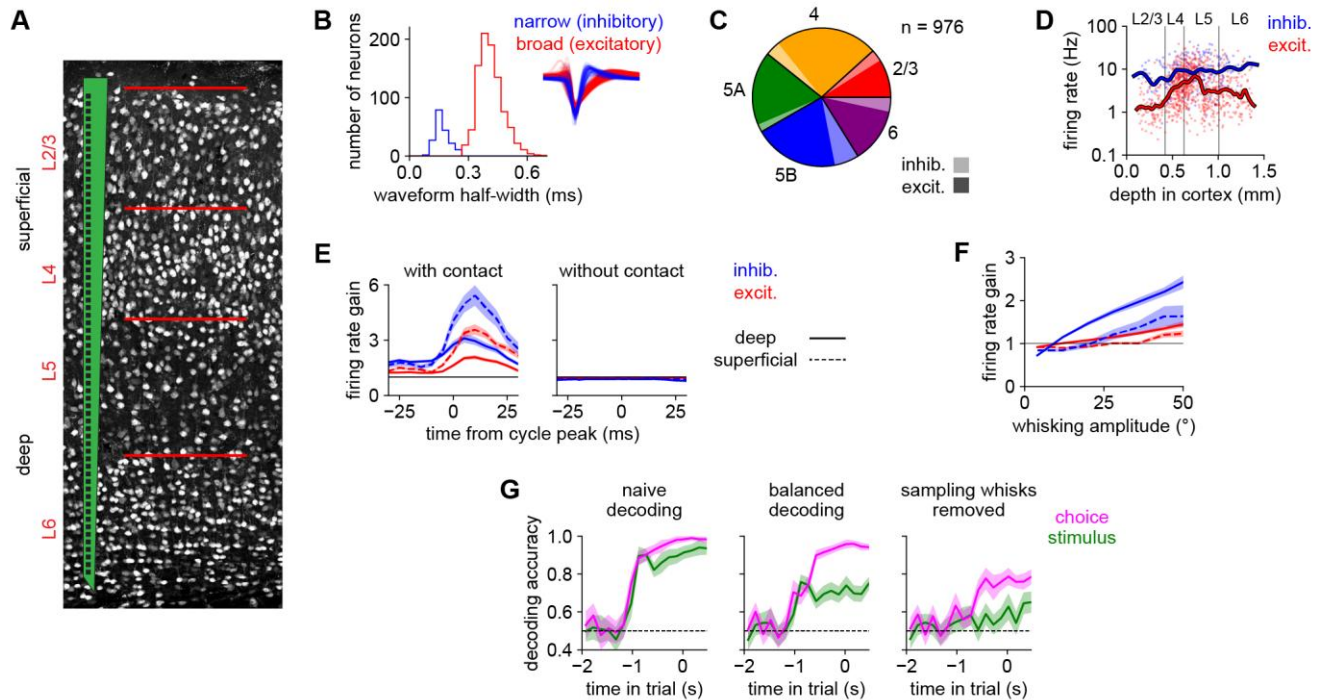

- 736  
737 **A)** Schematic of the multi-electrode array we used that spans all layers of cortex. Background: barrel cortex neurons labeled with  
738 NeuN.
- 739 **B)** The distribution of extracellular waveform half-widths (*i.e.*, the time between peak negativity and return to baseline) of  
740 recorded neurons. The distribution is strongly bimodal, permitting nearly unambiguous classification into narrow-spiking  
741 (putative inhibitory; blue) and broad-spiking (putative excitatory; red) cell types. Inset: normalized average waveforms from  
742 individual neurons. In panels B-F,  $n = 976$  neurons from both tasks, pooled because the results were similar.
- 743 **C)** Relative fraction of excitatory (dark) and inhibitory (light) neurons recorded in each layer.
- 744 **D)** Mean firing rates over the entire session of individual neurons versus their depth in cortex. Inhibitory and deep-layer neurons  
745 typically exhibit higher firing rates. Lines: smoothed with a Gaussian kernel.
- 746 **E)** Firing rate gain (responses divided by each cell's mean firing rate over a session) locked to the whisk cycle for superficial  
747 (L2/3 and L4; dashed lines) and deep (L5 and L6; solid lines) neurons, separately plotted for whisks with contact (left) and  
748 without contact (right). Absolute firing rates shown in Supplemental Fig 4. Error bars: SEM over neurons.
- 749 **F)** Firing rate gain of each cell type on individual whisk cycles without contact (y-axis) versus the amplitude of that whisk cycle  
750 (x-axis). Deep inhibitory neurons (solid blue line) are modulated most strongly. Error bars: SEM over neurons.
- 751 **G)** Stimulus (green) or choice (pink) can be decoded from a pseudopopulation ( $n = 450$  neurons) aggregated across shape  
752 discrimination sessions (timescale defined in Fig 1C). *Left:* With a naive (unbalanced) approach, stimulus or choice can be  
753 decoded with similar accuracy. *Middle:* Equally balancing correct and incorrect trials decouples stimulus and choice. *Right:*  
754 Removing spike counts from all sampling whisks (*i.e.*, whisks sufficiently large to reach the shapes) largely abolishes stimulus  
755 information while choice information remains. Dashed line: chance. Error bars: 95% bootstrapped confidence intervals.

756

757

## Figure 5. Heterogeneous coding of sensorimotor and task-related features.

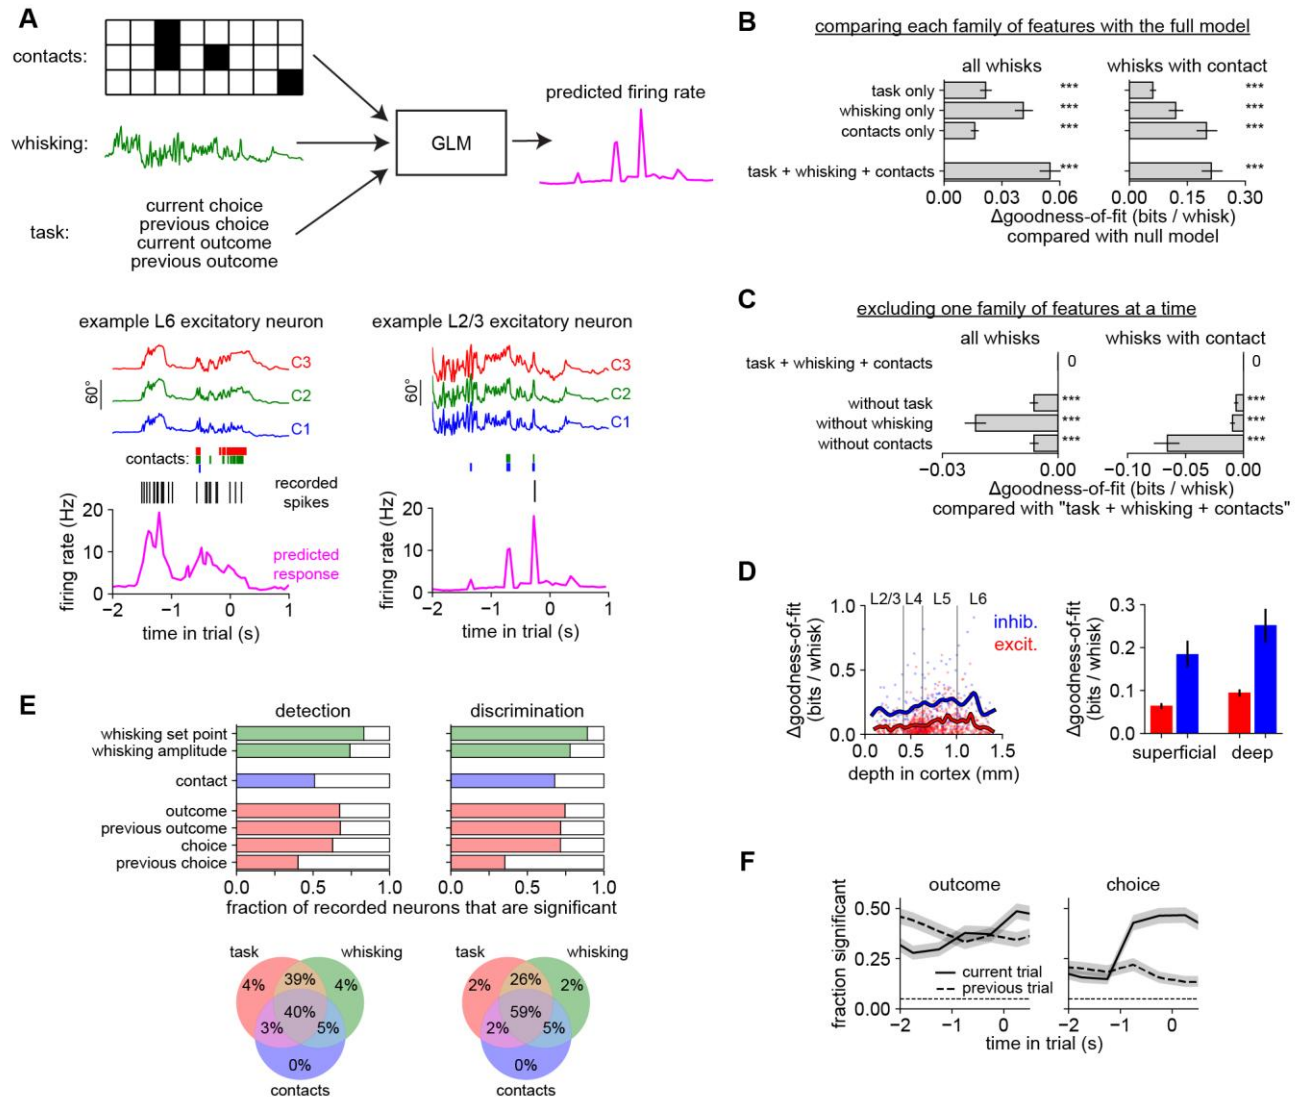

758

759

760

761

762

763

764

765

766

767

768

769

770

771

772

773

774

775

776

777

778

779

780

- A)** We used features from contacts (whisker identity), whisking (amplitude and set point), and task (choice and reward history) to train a GLM to predict neural responses on individual whisk cycles in held-out data. *Bottom left:* Example model predictions of firing rate (pink) for an example neuron (black raster: recorded spikes) given the position of each whisker (colored traces) and contacts (colored bars). This L6 neuron mainly responded to whisking, regardless of contacts. *Bottom right:* This L2/3 neuron mainly responded to contacts regardless of whisking. On this trial, it spiked only once.
- B)** The goodness-of-fit (*i.e.*, ability to predict neural responses) of the GLM using features from the task, whisking, or contact families. Each feature family significantly improves the log-likelihood over a null model that used only information about baseline firing rate ( $p < 0.001$ , Wilcoxon test). The full model ("task + whisking + contacts") outperforms any individual feature family. Similar results are obtained when testing on the entire dataset (*left*) or only on whisks with contact (*right*).  $n = 301$  neurons during shape detection and  $n = 675$  neurons during shape discrimination, pooled because the results were similar.
- C)** The effect on goodness-of-fit of leaving out one family at a time from the full "task + whisking + contacts" model. Removing any of these feature families significantly decreases the goodness-of-fit, showing that each family contains unique information that cannot be obtained from the other families.
- D)** Goodness-of-fit versus cortical depth (left) and grouped by cell type (right) in the "task + whisking + contacts" model.
- E)** *Top:* Proportion of neurons that significantly encoded each variable during each task ( $p < 0.05$ , permutation test). *Bottom:* Venn diagram showing percentage of neurons significantly encoding features from task (red), whisking (green), and contact (blue) families during each task. In both tasks, a plurality of neurons encoded all three.  $< 1\%$  of neurons did not significantly encode any of the features.
- F)** Proportion of neurons significantly modulated by the outcome or choice of the previous (dashed) or current (solid) trial during shape discrimination. Timescale defined in Fig 1C.

Error bars: 95% confidence intervals, obtained by bootstrapping (B-D) or from a fit to a binomial distribution (F).

781

## Figure 6. The formatting of contact responses facilitates decoding of shape identity.

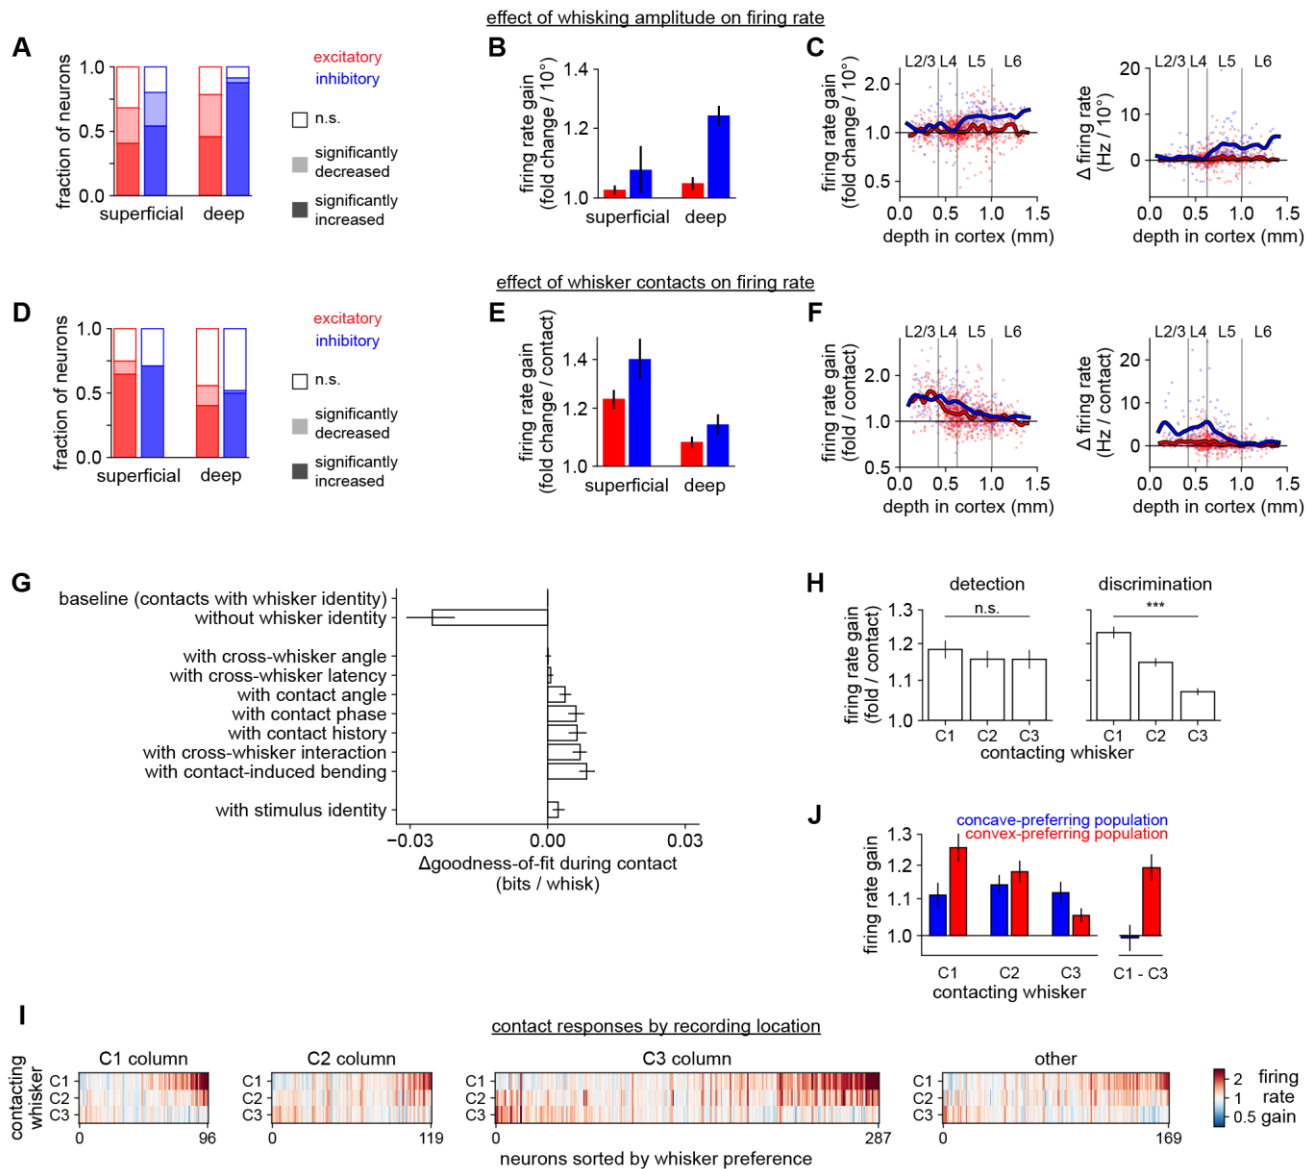

782

783

784

785

786

787

788

789

790

791

792

793

794

795

796

797

798

799

800

801

802

803

- A)** Proportion of neurons that are significantly excited (dark bars), suppressed (light bars), or unmodulated (open) by whisking amplitude, separately by cell type ( $p < 0.05$ , permutation test). In (A-C),  $n = 301$  neurons during shape detection and  $n = 675$  neurons during shape discrimination, pooled because the results were similar.
- B)** Firing rate gain per each additional 10 degrees of whisking amplitude, grouped by cell type. Gain of 1.0 indicates no effect.
- C)** Data in (B) for individual neurons plotted versus cortical depth. Blue and red lines: smoothed with a Gaussian kernel. *Left*: firing rate gain; *right*: change in absolute firing rate.
- D-F)** Like panels (A-C), but for whisker contacts (averaged across C1, C2, and C3 whiskers). In (D-H),  $n = 235$  neurons during shape detection and  $n = 675$  neurons during shape discrimination. We excluded neurons for which too few whisker contacts occurred to estimate a response.
- G)** Goodness-of-fit of models using different kinematic features about contacts, compared to the “task + whisking + contacts” model (top row, “baseline”). Removing whisker identity (second row) markedly decreases the quality of the fit. Adding additional kinematic parameters provides only a small increase in fit quality. The last row includes stimulus identity.
- H)** Response to contacts of each whisker. *Left*: During shape detection, the population responds nearly equally to each whisker ( $p > 0.05$ ; one-way ANOVA). *Right*: During shape discrimination, the population strongly prefers C1 contacts ( $p < 0.001$ ).
- I)** Responses to contacts made by each whisker for every recorded neuron during shape discrimination ( $n = 675$ ), split by columnar location of the neuron. Tuning is diverse but neurons preferring C1 contacts are more common.
- J)** The data in (H) broken into subpopulations that responded more during convex choices ( $n = 110$ ; red) or concave choices ( $n = 76$ ; blue), as assessed by the decoder analysis in Fig 4G. Neurons that fire more for convex choices respond much more strongly to C1 contacts than to C3 contacts, similar to the weights used by the optimized behavioral decoder (*cf.* Fig 3G).

Logarithmic y-axis in B-C, E-F, H, and J. Error bars: 95% bootstrapped confidence intervals in B, E, and G; SEM in H and J.

## 804 **STAR Methods**

### 805 **Resource Availability**

#### 806 *Materials Availability*

807 This study did not generate any unique reagents.

808

#### 809 *Data and Code Availability*

810 Upon publication of this manuscript, all data and code necessary to generate the results presented here  
811 will become publicly available at [github.com](https://github.com) and [crcns.org](https://crcns.org).

812

### 813 **Experimental Model and Subject Details**

814 We report data here from 17 adult mice (11 females and 6 males) of the C57BL6/J strain bred in the  
815 Columbia University animal facilities. 11 mice were used for shape discrimination, 5 for shape detection,  
816 and an image was used from 1 mouse from a different, anatomical study (Fig 4A). Of these, one shape  
817 discrimination mouse was discarded from all video analysis because of poor video quality, but was still  
818 used for behavioral performance data in Supplemental Fig 1A.

819

820 Mice in our colony are continuously backcrossed to C57BL6/J wild-type mice from Jackson Laboratories.  
821 Some mice expressed Cre, CreER, Halorhodopsin, Channelrhodopsin2, and/or EGFP for ongoing and  
822 unpublished studies. We noted no difference in the results regardless of the genes expressed and  
823 therefore pooled the data here. Mice were group-housed (unless they did not tolerate this) and lived in a  
824 pathogen-free barrier facility. All experiments were conducted under the supervision and approval of the  
825 Columbia University Institutional Animal Care and Use Committee.

826

### 827 **Method Details**

#### 828 *Surgeries*

829 Mice were implanted with a custom-designed stainless steel headplate (manufactured by Wilke Engineuity)  
830 between postnatal day 90 and 180. They received carprofen and buprenorphine and were anesthetized  
831 with isoflurane throughout the stereotaxic procedure. Using aseptic technique, we removed the scalp and  
832 fascia covering the dorsal surface of the skull. We then positioned the headplate over the skull and affixed  
833 it with Metabond (Parkell).

834

835 After behavioral training (see below), some mice underwent another procedure to permit  
836 electrophysiological recording. First, we used a dental drill to thin the cement and skull over barrel cortex,  
837 rendering it optically transparent, and coated it with cyanoacrylate glue (Vetbond). We used intrinsic  
838 optical signal imaging (described below) to locate the cortical columns of the barrel field corresponding to  
839 the whiskers on the face. We then used a scalpel (Fine Science) to cut a small craniotomy directly over  
840 the columns of interest. Between recording sessions, the craniotomy was sealed with silicone gel (Dow  
841 DOWSIL 3-4680, Ellsworth Adhesives) and/or silicone sealant (Kwik-Cast, World Precision Instruments).

842

#### 843 *Intrinsic signal optical imaging*

844 Individual barrel-related cortical columns were located with intrinsic imaging. While the mice were  
845 anesthetized with isoflurane, individual whiskers were deflected one at a time by a piezoelectric stimulator  
846 (8 pulses in the rostral direction at 5 Hz, with ~30 s between trains). We used custom software written in  
847 LabView (National Instruments) to acquire images of the cortical surface through the transparent thinned  
848 skull under a red light source with a Rolera CCD camera (QImaging). Videos were averaged over 20-60  
849 trains of pulses. We repeated this procedure for the C1, C2, and C3 whiskers to locate the region of  
850 maximal initial reflectance change corresponding to each.

851



## 852 *Behavioral apparatus*

853 The behavioral apparatus was contained within a black box (Foremost) with a light-blocking door. It was  
854 built with posts (Thorlabs) and custom-designed laser-cut plastic pieces on an aluminum bread board  
855 (Edmund Optics, Thorlabs, or Newport). A stepper motor (Pololu 1204) rotated a custom-designed curved  
856 shape 3D-printed with ABS plastic (Shapeways) into position, and a linear actuator (Actuonix L12-30-50-6-  
857 R) moved it within reach of the mouse's whiskers. Rewards (~5  $\mu$ L of water, chosen based on the mouse's  
858 weight and how many trials it typically completed) were delivered by opening a solenoid valve (The Lee  
859 Co. LFAA1209512H) that allowed water to flow to the mouse from a reservoir to a thin stainless steel tube  
860 (McMaster).

861  
862 An Arduino Uno, in communication with a desktop computer over a USB cable, controlled the motors. It  
863 also monitored licking by sampling beam breaks of the mouse's tongue through infrared proximity  
864 detectors (QRD1114, Sparkfun) or capacitive touch sensors (MPR121, Sparkfun) in front of and slightly to  
865 the left or right of the mouse's mouth, inspired by a published two-choice design (Guo et al., 2014).  
866 Between trials only, the Arduino activated a white "house light" (LE LED; Amazon B00YMNS4YA) that  
867 prevented mice from fully dark-adapting, preventing the use of visual cues. A computer fan (Cooler  
868 Master; Amazon B005C31GIA) continuously blew air slowly over the shape such that the mouse's nose  
869 was upwind from the shape, preventing the use of olfactory cues. We never observed mice exploiting  
870 auditory or vibrational cues from the motors and thus no masking noises were necessary.

871  
872 At a fine timescale the trial structure was controlled by the Arduino using a custom-written sketch. At the  
873 level of individual trials, the desktop PC chose the stimulus and correct response and logged all events  
874 read from the Arduino to disk using custom Python code. The training parameters for each mouse were  
875 stored in a custom-written django database and updated manually or semi-manually by the experimenters  
876 depending on each mouse's progress.

## 877 878 *Behavioral training*

879 Throughout, the mice were denied access to water in the home cage and learned to receive their water  
880 during behavioral training. We closely monitored their water intake, weight, and general health to ensure  
881 they did not become dehydrated. *Ad libitum* water was provided if necessary to ensure health.

882  
883 Mice were trained to perform either the shape discrimination or detection tasks using a process of gradual  
884 behavioral shaping described below. Some mice were additionally trained to discriminate flatter, more  
885 difficult shapes.

- 886  
887 1. "Lick training." Mice initially learned to lick to receive water. They were advanced through each step  
888 of this stage only once they learned to receive sufficient daily water from the apparatus. First, they  
889 were placed in the apparatus without head-fixing and allowed to drink freely from the water pipes,  
890 which rewarded every lick. Next, we head-fixed the mice directly in front of a single lick pipe and  
891 rewarded every lick. Finally, mice were presented with two lick pipes (left and right) and learned to  
892 lick alternately from each of them, first in blocks of ten licks and gradually decreasing to a single  
893 lick on each side. This stage required 12.5 sessions on average.
- 894 2. "Forced alternation". We introduced the complete trial structure for the first time, presenting shapes  
895 and rewarding the mouse only for correct responses and punishing it with a timeout for incorrect  
896 responses. During this stage the shape on each trial was not random; instead, mice were  
897 repeatedly presented with the same shape trial after trial until it gave the correct response. After a  
898 correct response, the other stimulus was presented. Thus, mice could perform at 100% by

- 899 alternating responses from trial to trial. The timeout was initially 2 s and then increased to 5 s and  
900 finally 9 s as the mice became accustomed to it. This stage required 11.3 sessions on average.
- 901 3. “Stimulus randomization with bias correction”. During this stage, stimulus identity was randomized  
902 on each trial and only presented at the closest position. Each session began with 45 trials of  
903 “forced alternation” to ensure that mice were able to lick both directions. After that, trials were  
904 generally random. The software continuously monitored their performance for biases; when a  
905 strong bias was detected, it stopped presenting trials randomly and began presenting trials  
906 designed to counteract the bias. For instance, if mice responded on the left  $\geq 20\%$  more than on the  
907 right, the software would deliver only right trials. Alternatively, if the mice showed a significant  
908 perseverative bias (ANOVA “choice ~ stimulus + side + previous\_choice”,  $p < 0.05$  on  
909 previous\_choice), the software would deliver “forced alternation” trials. Critically, we only ever  
910 analyzed truly random trials from the session. Non-random trials were used only for behavioral  
911 shaping and were discarded from behavioral and neural analyses.
  - 912 4. “Range of positions”. We now presented shapes at the first 2 positions (close and medium) and  
913 then all 3 positions (close, medium, and far). Position was randomized across trials. The same  
914 automatic training and bias-prevention procedures as before were used.
  - 915 5. “Flatter shapes”. Some mice were now presented with flatter shapes as well as the shapes of the  
916 original curvature. Other mice skipped this stage and were never presented with flatter shapes.
  - 917 6. “Whisker trimming”. We gradually trimmed whiskers off the right side of the face: first we trimmed  
918 the A and E rows, then the B row, then the D row. After any trimming, we allowed mice to recover  
919 to high performance before trimming additional rows. We retrimmed previously trimmed whiskers  
920 as necessary to ensure they could not reach the shapes. Stages 3-6 required a total of 109.1  
921 sessions on average.

922

923 Sometimes it was necessary to return mice to an earlier stage of training temporarily to facilitate learning  
924 (e.g., reducing the number of positions at which the shapes were presented or returning to “forced  
925 alternation” trials only). Mice that successfully progressed through all stages of the training procedure—  
926 those who could identify both shapes at all three positions with only the C-row of whiskers—were deemed  
927 fully trained. We only took high-speed video or neural recordings from fully trained mice.

928

### 929 *Videography*

930 For videography and electrophysiology, we moved the behavioral setup to a different light-blocking box  
931 mounted on a vibration-isolating air table (TMC). We took video of fully trained mice using a high-speed  
932 camera (Photonfocus DR1-D1312IE-100-G2-8) with a 0.15 ms exposure time to prevent motion blur. We  
933 used a lens with a 25 cm focal length (Fujinon HF25HA-1B) to prevent “fisheye” distortion. An aperture (F-  
934 stop) of approximately 6.0 optimized depth of field.

935

936 We designed and built a custom infrared backlight with a 7x8 grid of high-power surface-mount infrared  
937 (850 nm) LEDs (Digikey VSMY2853G) soldered to a custom-designed PCB (manufactured by OSH Park)  
938 that allocated power to each LED through current-limiting resistors. Diffusion paper mounted above the  
939 LEDs homogenized the light. The backlight was placed below the mouse and pointed toward the camera  
940 so that the whiskers would show up as high-contrast black on a white background. The Arduino pulsed  
941 this backlight off for 100 ms at the beginning of each trial, allowing us to synchronize the behavioral and  
942 video data. We used Matlab’s Image Acquisition Toolbox to store the video data to an SSD.

943

### 944 *Electrophysiology*

945 To record neural activity, we head-fixed the mouse in the behavioral arena as usual and removed the  
946 temporary sealant over the craniotomy. We lowered an electrode array (Cambridge Neurotech H3) using a

947 motorized micromanipulator (Scientifica PatchStar), noting its depth at initial contact and at final position.  
948 We used an OpenEphys acquisition system with two digital headstages (Intan C3314) to record 64  
949 channels of neural data at 30 kHz at the widest possible bandwidth (1 Hz to 7.5 kHz). The backlight sync  
950 pulse was acquired with an analog input to synchronize the neural, behavioral, and video data.

951

952 We used KiloSort (Pachitariu et al., 2016) to detect spikes and to assign them to putative single units.  
953 Single units had to pass both subjective and objective quality checks. First, we used Phy (Rossant et al.,  
954 2016) to manually inspect every unit, merging units that appeared to be from the same origin based on  
955 their amplitude over time and their auto- and cross-correlations. Units that did not show a refractory period  
956 (*i.e.* a complete or partial dip in the auto-correlation within 3 ms) were deemed multi-unit and discarded.  
957 Second, single units had to pass all of the following objective criteria:  $\leq 5\%$  of the inter-spike intervals less  
958 than 3 ms;  $\leq 1.5\%$  change per minute in spike amplitude;  $\leq 20\%$  of the recording at  $< 5\%$  of the mean firing  
959 rate;  $\leq 15\%$  of the spike amplitude distribution below the detection threshold;  $\leq 3\%$  of the spike amplitudes  
960 below 10  $\mu\text{V}$ ;  $\leq 5\%$  of the spikes overlapping with common-mode artefacts.

961

962 We identified inhibitory neurons from their waveform half-width, *i.e.* the time between maximum negativity  
963 and return to baseline on the channel where this waveform had highest power. Neurons with a half-width  
964 below 0.3 ms were deemed narrow-spiking and putatively inhibitory. We measured the laminar location of  
965 each neuron (using the boundaries in Hooks et al., 2011) based on the manipulator depth and the channel  
966 on which the waveform had greatest RMS power. Neuron in L1 or the cortical subplate were discarded  
967 from this analysis because they were difficult to sort and showed variable properties across mice.

968

#### 969 *Histological reconstruction of recording locations*

970 We used a camera mounted on a surgical microscope to take a picture of the area around barrel cortex on  
971 every session from the time of intrinsic signal imaging to the end of the experiment. We aligned all of these  
972 images with each other using the TrakEM plugin (Cardona et al., 2012) in Fiji using surface vasculature.  
973 These images, referenced to individual barrel column locations determined by intrinsic signal imaging,  
974 were used to guide the placement of the craniotomy and the electrode. We also photographed and aligned  
975 images of the location of the implanted electrode array each day.

976

977 On the last day, we inserted a glass pipette coated with Dil (Sigma-Aldrich 468495) into the barrel field  
978 twice to leave two landmarks, one anterior and one posterior, which were also photographed and aligned.  
979 At the conclusion of the experiment, we deeply anesthetized the mice with pentobarbital, transcardially  
980 perfused them with 4% paraformaldehyde, and removed the brain for histological processing.

981

982 The left hemisphere was sectioned tangentially to the barrel field using a Vibratome or freezing microtome  
983 to cut 50 or 100  $\mu\text{m}$  sections. We stained for barrels with fluorescently conjugated streptavidin and imaged  
984 the sections on an epifluorescent microscope to reveal the location of the barrels and the Dil landmarks. In  
985 this way we confirmed the exact location of each recording site with respect to both the anatomical and  
986 functional barrel map.

987

## 988 **Quantification and statistical analysis**

### 989 *Statistics*

990 Throughout this manuscript, “\*” indicates  $p < 0.05$ ; “\*\*” indicates  $p < 0.01$ ; “\*\*\*” indicates  $p < 0.001$ ; and  
991 “n.s.” indicates “not significant”.

992

993 To non-parametrically estimate the width of certain non-normal distributions, we used “bootstrapped  
994 confidence intervals”. This means resampling the data with replacement 1000 times, taking the average of

995 each resampled dataset, and then taking the interval that spans the central 95% of this distribution of  
996 averages across resampled datasets.

997  
998 *Whisker video analysis*

999 We used a lightly modified fork of the `pose-tensorflow` package (Insafutdinov et al., 2016; Pishchulin et  
1000 al., 2015) to train and use a deep convolutional neural network to identify and track whiskers in the video.  
1001 This network is based on Resnet (He et al., 2015) and is the same “feature detector” network incorporated  
1002 into the first version of DeepLabCut (Mathis et al., 2018). We generated an initial training set using the  
1003 software `whisk` (Clack et al., 2012) to track individual whiskers and custom semi-automated code to  
1004 classify them.

1005  
1006 Eight equally spaced points along each tracked whisker were provided as the “joints” for the neural  
1007 network to identify. We iteratively improved the neural network by evaluating it on new frames, choosing  
1008 difficult frames from the result, semi-automatically improving the labels, swapping in the results from  
1009 `whisk` as necessary, and then using this new training set to train a new version of the network. Whiskers  
1010 of below-threshold confidence or below-threshold smoothness at any joint were discarded. We optimized  
1011 these thresholds with a cross-validated grid search.

1012  
1013 Sessions with inaccurate labeling were discarded: we required that every whisker be labeled in  $\geq 95\%$  of  
1014 the frames, that  $\leq 2\%$  of the contact events contained even a single frame with a missing label, and that  
1015 the arcs traced out over the entire session by the whisker contained no discontinuities or jumps suggestive  
1016 of tracking errors. In the remaining well-traced sessions we interpolated whiskers over any missing  
1017 frames.

1018  
1019 We identified the shape stimulus in each frame by thresholding and segmenting the frame and selecting  
1020 the segment of the appropriate size and location. We identified contacts on the shape based on proximity  
1021 ( $\leq 10$  pixels Cartesian distance) between the tip of each whisker and the edge of the shape.

1022  
1023 To estimate each whisker’s bending moment, we first fit a spline through its 8 identified joints and used the  
1024 “measure” function of `whisk` to estimate curvature ( $\kappa$ ).  $\kappa$  is the rate of change of direction of the whisker at  
1025 each point along its length, *i.e.* the reciprocal of the radius of curvature at that point, and is measured in  
1026 units of  $\text{m}^{-1}$ . `whisk` averages  $\kappa$  over the entire length of the traced whisker and we followed this  
1027 convention. For comparison with other studies, we note that  $1 \text{ m}^{-1}$  is equal to  $0.001 \text{ mm}^{-1}$  due to this  
1028 reciprocal.  $\kappa = 0$  for a straight line. In our study,  $\kappa > 0$  for a whisker pushing into a shape and  $\kappa < 0$  for the  
1029 reverse curvature, typically encountered while detaching from the shape.

1030  
1031 To register all videos within a common reference frame for visualization (Fig 3I-K), we extracted the  
1032 location of the shape edge at each location (close, medium, or far). Because we knew the exact distance  
1033 between edges in reality, we used the vector between adjacent locations in the image to measure the  
1034 angle and scale for that particular video. After compensating for this angle and scale, we used the peak in  
1035 the 2D cross-correlation to find the offset that best aligned the videos with each other.

1036  
1037 *Decomposition of individual whisks*

1038 We defined the whisker’s angle as the Cartesian angle between base and tip. We decomposed the  
1039 whisking signal into individual whisk cycles with the Hill transform (Hill et al., 2011). Briefly, we  
1040 bandpassed the data from 8 to 50 Hz and applied the Hilbert transform to extract phase. Peaks and  
1041 troughs were defined as frames where the phase crossed zero or  $\pi$ . We defined set point as the angle of  
1042 each whisker at the trough of each whisk cycle, and amplitude as the angular difference between peak

1043 and trough on each cycle for the C2 whisker. The whisking amplitude was very consistent across  
1044 whiskers, so we used the amplitude of the C2 whiskers cycle only throughout. In contrast the relative set  
1045 point of each whisker could vary, so we used the set point of each as regressors in the neural GLM  
1046 analysis. To smooth these amplitude and set point parameters, we applied a triangular window that  
1047 weighted one cycle before and after half as much as the current cycle.

1048

1049 To identify sampling whisks (those large enough to reach the shapes if they had been at their closest  
1050 position), we aligned the frames to the response window and found the convex hull of the edges of the  
1051 shape (i.e., the boundary of closest points to the whisker pad) versus time from the response window. A  
1052 “whisk without contact” was one on which the whiskers crossed this boundary. This could happen if, for  
1053 instance, the C3 whisker investigated the space where the medial portion of the closest concave shape  
1054 would be, but actually a convex shape was present or a concave shape at a further position (example: Fig  
1055 3A). A “whisk with contact” is any whisk on which contact was made. Sampling whisks are defined as  
1056 either “whisks with contact” or “whisks without contact”. All other whisks (non-sampling whisks) are those  
1057 which did not cross the convex hull described above and did not make contact with the shapes. Not all  
1058 trials contained contacts, but the vast majority of trials included at least one sampling whisk.

1059

#### 1060 *Lick rates (Fig 1D)*

1061 We recorded the times of all licks, even those before the response window that had no effect on the trial  
1062 outcome. In rare cases our detector recorded a single lick as many licks (the “switch bouncing” effect) and  
1063 so for analysis we binned licks in 100 ms bins and discarded any surplus licks above one per bin.

1064

1065 To plot the rate of correct or concordant licks, we calculated the rate of licking on each side on every trial  
1066 and defined each lick as “correct/incorrect” depending on whether it matched the correct side, and as  
1067 “concordant/discordant” depending on whether it matched the direction of the choice lick (i.e., the first lick  
1068 in the response window, which determined trial outcome). We then meaned the lick rates for each trial  
1069 type (correct, incorrect, concordant, discordant) within each mouse. Finally we divided the rate of correct  
1070 licks by the rate of all licks, and the rate of concordant licks by the rate of all licks, to generate the results  
1071 plotted in Fig 1D.

1072

#### 1073 *Behavioral decoding analysis (Figure 3)*

1074 We first selected only trials in which the mouse responded within the first 0.5 s of the response window in  
1075 order to ensure that behavior was roughly aligned across trials. This procedure excluded only a small  
1076 fraction of trials. In some sessions we used optogenetic stimulation for separate studies; any trial with  
1077 optogenetic stimulation was discarded from all analysis in this manuscript. In some sessions we also  
1078 presented flatter shapes (performance data: Supplemental Fig 1A) but for behavioral decoding and all  
1079 neural analyses we discarded any trials with the flatter shapes.

1080

1081 We then extracted all whisking and contact data from each trial from -2.0 to +0.5 s of the opening of the  
1082 response window and obliterated (set to zero or the mean value) all data after the time of the choice lick to  
1083 ensure that only pre-choice activity was included in the analysis. Each feature was measured on every  
1084 individual whisk (e.g., presence of contact, cross-whisker latency within that contact, interaction terms for  
1085 multiple-whisker contact; complete list in Supplemental Table 1). We then aggregated each feature within  
1086 250 ms bins locked to the response window opening, so that trials with different numbers of whisks could  
1087 be directly compared. Most features were aggregated by meaning within the bin, but count-related  
1088 features (like contact count) were aggregated by summing within the bin. Finally we concatenated some  
1089 task-related features like previous choice and previous outcome that did not depend on the whisk cycle.

1090

1091 If a feature was not defined for a time bin (for instance, cross-whisker contact timing and contact-induced  
1092 bending have no meaning if no contacts occurred), it was left as null (NaN). Because these parameters  
1093 were only measured during contacts, they implicitly contained information that a contact had occurred.  
1094 Specifically, they were null at all times other than during contact. During feature standardization (described  
1095 below), we ensured that these features could have no effect on the coefficients or fit when they were null.  
1096 The net result of this procedure is that these features could only be informative conditioned on the  
1097 presence of a contact. This permits their interpretation as modulating the information gleaned by the  
1098 mouse about each contact, above and beyond the mere presence of a contact *per se*.

1099  
1100 The result of this feature selection process was 725 features per trial, some of which (e.g., contact count)  
1101 depended on time bin and some of which (e.g., previous choice) did not. For each session, we  
1102 standardized all features by scaling them to zero mean and unit standard deviation. At this point we  
1103 imputed null (NaN) features with zero, so that they could not affect the coefficients obtained. We used the  
1104 same procedures to fit individual features (Fig 2B) or combinations of features (Fig 2C).

1105  
1106 *Cross-validation scheme:* Each session was fit separately. We grouped the trials into 4 separate “strata”,  
1107 with one stratum for each combination of choice and stimulus (concave/convex for discrimination;  
1108 something/nothing for detection). We split the data into 7 “folds” for cross-validation, equally sampling  
1109 trials from each stratum. Each trial was in the “testing” set for one fold, the “tuning” set for one fold, and  
1110 the “training” set for five folds. For each fold, we fit a logistic regression model  
1111 (`sklearn.linear_model.LogisticRegression`) on the training set over a range of different regularization  
1112 parameters. We then evaluated the model on the held-out tuning set and chose the regularization that  
1113 optimized classifier accuracy over all sessions. Finally we evaluated the model with the chosen  
1114 regularization on the doubly held-out testing set and took that score as the model’s overall accuracy.

1115  
1116 To analyze the weights of the classifier for the session as a whole, we averaged the weights across folds.  
1117 To analyze the prediction on an individual trial, we used the classifier for which that trial was in the testing  
1118 (doubly held-out) set. Because each trial was in the testing set in exactly one fold, there was only one  
1119 unique prediction per trial.

1120  
1121 *Trial balancing to decorrelate stimulus and choice:* We weighted every trial inversely to its prevalence in  
1122 the dataset, using the `sample_weight` argument. Essentially, if correct trials were three times more  
1123 common than errors, then we weighted each individual error three times as much, so that the total weight  
1124 assigned to correct and incorrect trials was equal. This balancing effectively decoupled the correlated  
1125 target labels stimulus and choice. We validated this approach by comparing the results to other balancing  
1126 schemes like undersampling to the size of the smallest stratum or over-sampling by bootstrapping (data  
1127 not shown).

1128  
1129 *Aggregation:* To aggregate results across mice (e.g., Fig 3D,F) we averaged the accuracy of the classifier  
1130 across sessions within each mouse first. The sample size for error bars and statistical tests was then  
1131 equal to the number of mice.

1132  
1133 To plot the weights of the classifier in Fig 3G, we first averaged the weights over time for simplicity.  
1134 Because the coefficients plotted in Fig 3G are related to contact counts, we multiplied the coefficients by  
1135 the standard deviation of the corresponding column in the feature matrix before standardization. This  
1136 effectively reverse the normalization, and puts the coefficient in more-interpretable “per contact” units  
1137 rather than “per standard deviation of contact count” units. This was for visualization only and did not  
1138 affect the results.

1139

1140 To plot the evidence in Fig 3K, we applied the weights of the decoder to each individual whisk cycle and  
1141 meaned this evidence over all whisks with a peak within that spatial bin. For visualization in this panel, we  
1142 used a model that incorporated the peak angle of whisks without contact.

1143

#### 1144 *Neural decoding analysis (Fig 4G)*

1145 To decode stimulus and choice from neural activity, we used a resampling/bootstrapping approach to  
1146 combine neural data across sessions and mice. First the trials were split into five equally sized “folds”, one  
1147 of which was the “test fold” and the rest “train folds”. No tuning set was necessary because we fixed the  
1148 regularization at 1.0 in this analysis. For each shape (concave or convex), we randomly chose a single  
1149 trial with that shape from the test fold in each session. We concatenated all of the neural data from those  
1150 trials into a “pseudopopulation” as if all the neurons had been recorded simultaneously. We then repeated  
1151 this process 30 times to construct 30 pseudotrials of the test fold. Then, we repeated the process for the  
1152 train folds, to generate 120 pseudotrials of the train folds. By construction, the same trial could never be  
1153 included in both the test and train folds.

1154

1155 The classifier was trained on the train fold and evaluated on the test fold. Because correlations can have a  
1156 strong impact on the amount of information encoded by a neuronal population (Nogueira et al., 2020), we  
1157 maintained the correlation structure between simultaneously recorded neurons. Specifically, for each  
1158 pseudotrial we sampled the same trial from each simultaneously recorded neuron. The entire process was  
1159 repeated 100 times to generate the bootstrapped confidence intervals displayed in the plot.

1160

1161 We call the procedure above the “naive” approach because it does not balance hits and errors; hence, it  
1162 confounds stimulus and choice. This naive approach is used in the left panel of Fig 4G. We also used a  
1163 “balanced” approach to disentangle stimulus and choice in the middle and right panels of Fig 4G.  
1164 Specifically, we first divided all the trials into 4 strata (concave hit, concave error, convex hit, convex error)  
1165 instead of the 2 strata (concave or convex) used in the naive approach. We then repeated the same  
1166 resampling approach to draw pseudotrials from each of the 4 strata. This ensures equal weighting of  
1167 correct and incorrect trials; hence, it is balanced. We used disjoint train and test folds just as in the naive  
1168 approach.

1169

1170 In all cases, to train the classifier we first standardized the firing rate of each neuron in the  
1171 pseudopopulation to zero mean and unit variance. We provided these normalized firing rates to a classifier  
1172 (`sklearn.linear_model.LogisticRegression`) and trained it to predict either the stimulus or choice on each  
1173 trial. We trained separate classifiers on every time bin in the training fold. We used the classifiers to  
1174 predict stimulus or choice on each trial in the held-out test fold.

1175

1176 For both naive and balanced classifiers, we repeated the entire procedure five times, such that each trial  
1177 was included in the test fold exactly once (and in the training fold the other four times). We averaged the  
1178 classifier’s accuracy over each of the four held-out test sets (never including the training set) and reported  
1179 this as the classifier’s overall cross-validated accuracy in Fig 4G.

1180

1181 Finally, for the right panel of Fig 4G, we zeroed out the spikes on all “sampling whisks” (defined above in  
1182 the videographic methods). We also zeroed out spikes on the cycle preceding and the two cycles following  
1183 each sampling whisk to ensure complete removal of whisk-locked stimulus information. This procedure  
1184 removed phasic contact-evoked or whisk-evoked stimulus responses, but spared long-timescale persistent  
1185 representations.

1186

1187 *Neural encoding analysis (Fig 5, 6)*

1188 For this analysis, we began with the same features (contact count, etc.) from the behavioral analysis.  
1189 Rather than aggregate within arbitrary time bins, we used the feature measurements on individual whisk  
1190 cycles. We added some additional features that could affect neural firing: the amplitude (peak-to-trough  
1191 angle) of each whisk and the set point (start angle) of each individual whisker at the beginning of each  
1192 whisk.

1193  
1194 We also added some additional trial-related features: current choice, previous choice, current outcome  
1195 (rewarded or not), and previous outcome. Because the effect of these features could vary over the course  
1196 of the trial, we used separate temporal indicator variables (Park et al., 2014). Specifically, we divided all  
1197 whisks into 500 ms bins with respect to the response window opening. If the current choice was “left”, we  
1198 marked the temporal indicator variable corresponding to left choices within that whisk’s bin as 1, and left  
1199 all other variables as zero. We repeated this for each task variable.

1200  
1201 Finally, we added two “nuisance features” for firing rate drift and cycle duration. For firing rate drift, we  
1202 divided each session into 10 blocks and assessed the mean firing rate of each neuron within that block.  
1203 We provided the logarithm of this value as a feature to the GLM. The timescale of each block was far too  
1204 long (~several minutes) to contain any information about individual whisks, but it captured the baseline  
1205 firing rate of the neuron, as well as any long-timescale variations, for example due to satiety. The second  
1206 nuisance feature was the logarithm of the duration of each individual whisk cycle. This is because a whisk  
1207 cycle that is twice as long should be expected to emit twice as many spikes, all else equal. The use of a  
1208 logarithm in both cases accounts for the exponential link function in the GLM. Both of these nuisance  
1209 features are highly predictive of neural firing by design and were important for fitting the data but were not  
1210 analyzed further for scientific conclusions.

1211  
1212 We fit the data using a GLM for Poisson data like spike counts (*i.e.*, with an exponential link function)  
1213 using the `pyglmnet` module (Jas et al., 2020). We used 5-fold cross-validation, ensuring that each trial  
1214 was in the test set exactly once and evaluating the GLM on these held-out test sets only. We always used  
1215 L2 regularization but we varied the strength of this regularization. We typically used the regularization  
1216 value that optimized the model fit for that neuron, but when comparing coefficients across neurons (e.g.,  
1217 Fig 6) the same value of regularization was used for all neurons to ensure coefficients were on the same  
1218 scale.

1219  
1220 In order to obtain the null distributions of each coefficient and thereby significance, we also trained 40  
1221 additional GLMs for each neuron using permuted features. Specifically we permuted the rows but not the  
1222 columns of the feature matrix, which maintains the correlation structure of the features but randomizes the  
1223 mapping to neural responses. The distribution of each coefficient over permutations had a near-zero mean  
1224 but a non-zero standard deviation. To assess significance of individual coefficients (e.g. Fig 5E-F) we  
1225 divided the actual coefficient by the standard deviation of the coefficients obtained on the permutations to  
1226 obtain the z-score of the coefficient. We then converted this into a two-tailed p-value by integrating the  
1227 standard normal beyond this z-score. We validated that this approach controlled the false positive rate at  $\alpha$   
1228 = 0.05 by including a spurious regressor that was drawn from a random distribution and ensuring that the  
1229 random regressor was found significant no more than 5% of the time (indeed, that the resulting p-value  
1230 distribution was uniform; data not shown).

1231  
1232 To assess goodness-of-fit of any GLM, we took the log-likelihood of the data under the best fit and  
1233 compared it to the log-likelihood of the data under a null model. The null model had access only to the  
1234 “nuisance features” described above: baseline firing rate and whisk cycle duration. We subtracted the log-



1235 likelihood of the null from the log-likelihood of the fit model, and divided by the total number of whisks in  
1236 that session in order to permit comparison across datasets of different duration. We used a logarithm of  
1237 base 2 to permit presentation in “bits”. This is not an estimate of the information contained by the neural  
1238 spike train, but rather an estimate of the change in the KL-divergence between [the true (unknown)  
1239 distribution of the data and the distribution predicted by the model under consideration] versus [the same  
1240 quantity, but replacing the model under consideration with the null model].

1241

#### 1242 *Analysis software*

1243 We used the Python packages ipython (Perez and Granger, 2007), pandas (McKinney, 2010), numpy  
1244 (Van Der Walt et al., 2011), scipy (Virtanen et al., 2020), scikit-learn (Pedregosa et al., 2011), scikit-image  
1245 (Van Der Walt et al., 2014), statsmodels, pyglmnet (Jas et al., 2020), and matplotlib (Hunter, 2007) to  
1246 investigate, analyze, and present the data.

1247

## References

- 1248 Adesnik, H., and Naka, A. (2018). Cracking the Function of Layers in the Sensory Cortex. *Neuron* 100, 1028–1043.
- 1249 Ahissar, E., and Assa, E. (2016). Perception as a closed-loop convergence process. *Elife* 5, 1–26.
- 1250 Akrami, A., Kopec, C.D., Diamond, M.E., and Brody, C.D. (2018). Posterior parietal cortex represents sensory history and  
1251 mediates its effects on behaviour. *Nature* 554, 368–372.
- 1252 Anjum, F., Turni, H., Mulder, P.G.H., van der Burg, J., and Brecht, M. (2006). Tactile guidance of prey capture in Etruscan shrews.  
1253 *Proc. Natl. Acad. Sci. U. S. A.* 103, 16544–16549.
- 1254 Ayaz, A., Stäuble, A., Hamada, M., Wulf, M.A., Saleem, A.B., and Helmchen, F. (2019). Layer-specific integration of locomotion  
1255 and sensory information in mouse barrel cortex. *Nat. Commun.* 10.
- 1256 Bale, M.R., and Maravall, M. (2018). Organization of sensory feature selectivity in the whisker system. *Neuroscience* 368, 70–80.
- 1257 Bandyopadhyay, S., Shamma, S.A., and Kanold, P.O. (2010). Dichotomy of functional organization in the mouse auditory cortex.  
1258 *Nat. Neurosci.* 13, 361–368.
- 1259 Benison, A.M., Ard, T.D., Crosby, A.M., and Barth, D.S. (2006). Temporal patterns of field potentials in vibrissa/barrel cortex  
1260 reveal stimulus orientation and shape. *J. Neurophysiol.* 95, 2242–2251.
- 1261 Birdwell, J.A., Solomon, J.H., Thajchayapong, M., Taylor, M.A., Cheely, M., Towal, R.B., Conradt, J., and Hartmann, M.J.Z.  
1262 (2007). Biomechanical models for radial distance determination by the rat vibrissal system. *J. Neurophysiol.* 98, 2439–2455.
- 1263 Bortone, D.S., Olsen, S.R., and Scanziani, M. (2014). Translaminar inhibitory cells recruited by layer 6 corticothalamic neurons  
1264 suppress visual cortex. *Neuron* 82, 474–485.
- 1265 Brecht, M. (2017). The Body Model Theory of Somatosensory Cortex. *Neuron* 94, 985–992.
- 1266 Brecht, M., Preilowski, B., and Merzenich, M.M. (1997). Functional architecture of the mystacial vibrissae. *Behav. Brain Res.* 84,  
1267 81–97.
- 1268 Brecht, M., Roth, A., and Sakmann, B. (2003). Dynamic receptive fields of reconstructed pyramidal cells in layers 3 and 2 of rat  
1269 somatosensory barrel cortex. *J. Physiol.* 553, 243–265.
- 1270 Brown, J., Oldenburg, I.A., Telian, G.I., Griffin, S., Voges, M., Jain, V., and Adesnik, H. (2020). Spatial integration during active  
1271 tactile sensation drives elementary shape perception. *BioRxiv*.
- 1272 Brumberg, J.C., Pinto, D.J., and Simons, D.J. (1996). Spatial gradients and inhibitory summation in the rat whisker barrel system.  
1273 *J. Neurophysiol.* 76, 130–140.
- 1274 Bruno, R.M., and Sakmann, B. (2006). Cortex is driven by weak but synchronously active thalamocortical synapses. *Science* (80-  
1275 ). 312, 1622–1627.
- 1276 Bruno, R.M., and Simons, D.J. (2002). Feedforward mechanisms of excitatory and inhibitory cortical receptive fields. *J. Neurosci.*  
1277 22, 10966–10975.
- 1278 Bush, N.E., Solla, S.A., and Hartmann, M.J. (2016). Whisking mechanics and active sensing. *Curr. Opin. Neurobiol.* 40, 178–188.
- 1279 Campagner, D., Evans, M.H., Bale, M.R., Erskine, A., and Petersen, R.S. (2016). Prediction of primary somatosensory neuron  
1280 activity during active tactile exploration. *Elife* 5, 1–18.
- 1281 Campagner, D., Evans, M.H., Chlebkikova, K., Colins-Rodriguez, A., Loft, M.S.E., Fox, S., Pettifer, D., Humphries, M.D., Svoboda,  
1282 K., and Petersen, R.S. (2019). Prediction of choice from competing mechanosensory and choice-memory cues during active  
1283 tactile decision making. *J. Neurosci.* 39, 3921–3933.
- 1284 Carcea, I., Insanally, M.N., and Froemke, R.C. (2017). Dynamics of auditory cortical activity during behavioural engagement and  
1285 auditory perception. *Nat. Commun.* 8, 1–12.
- 1286 Cardona, A., Saalfeld, S., Schindelin, J., Arganda-Carreras, I., Preibisch, S., Longair, M., Tomancak, P., Hartenstein, V., and  
1287 Douglas, R.J. (2012). TrakEM2 software for neural circuit reconstruction. *PLoS One* 7.
- 1288 Carvell, G.E., and Simons, D.J. (1990). Biometric analyses of vibrissal tactile discrimination in the rat. *J. Neurosci.* 10, 2638–2648.
- 1289 Carvell, G.E., and Simons, D.J. (1995). Task- and subject-related differences in sensorimotor behavior during active touch.  
1290 *Somatosens. Mot. Res.* 12, 1–9.
- 1291 Celikel, T., and Sakmann, B. (2007). Sensory integration across space and in time for decision making in the somatosensory  
1292 system of rodents. *Proc. Natl. Acad. Sci. U. S. A.* 104, 1395–1400.
- 1293 Chapman, C.E., and Ageranoti-Bélangier, S.A. (1991). Discharge properties of neurones in the hand area of primary  
1294 somatosensory cortex in monkeys in relation to the performance of an active tactile discrimination task - I. Areas 3b and 1.  
1295 *Exp. Brain Res.* 87, 319–339.
- 1296 Chen, J.L., Carta, S., Soldado-Magraner, J., Schneider, B.L., and Helmchen, F. (2013). Behaviour-dependent recruitment of long-  
1297 range projection neurons in somatosensory cortex. *Nature* 499, 336–340.
- 1298 Cheung, J., Maire, P., Kim, J., Sy, J., Cheung, J., Maire, P., Kim, J., Sy, J., and Hires, S.A. (2019). The Sensorimotor Basis of  
1299 Whisker-Guided Anteroposterior Object Localization in Head-Fixed Mice. *Curr. Biol.* 1–12.
- 1300 Clack, N.G., O'Connor, D.H., Huber, D., Petreanu, L., Hires, A., Peron, S., Svoboda, K., and Myers, E.W. (2012). Automated  
1301 tracking of whiskers in videos of head fixed rodents. *PLoS Comput. Biol.* 8, e1002591.
- 1302 Clancy, K.B., Schnepel, P., Rao, A.T., and Feldman, D.E. (2015). Structure of a Single Whisker Representation in Layer 2 of  
1303 Mouse Somatosensory Cortex. *J. Neurosci.* 35, 3946–3958.
- 1304 Connor, C.E., Brincat, S.L., and Pasupathy, A. (2007). Transformation of shape information in the ventral pathway. *Curr. Opin.*  
1305 *Neurobiol.* 17, 140–147.
- 1306 Constantinople, C.M., and Bruno, R.M. (2013). Deep cortical layers are activated directly by thalamus. *Science* 340, 1591–1594.
- 1307 Cruikshank, S.J., Lewis, T.J., and Connors, B.W. (2007). Synaptic basis for intense thalamocortical activation of feedforward  
1308 inhibitory cells in neocortex. *Nat. Neurosci.* 10, 462–468.
- 1309 Curtis, J.C., and Kleinfeld, D. (2009). Phase-to-rate transformations encode touch in cortical neurons of a scanning sensorimotor  
1310 system. *Nat. Neurosci.* 12, 492–501.
- 1311 Dabney, W., Kurth-Nelson, Z., Uchida, N., Starkweather, C.K., Hassabis, D., Munos, R., and Botvinick, M. (2020). A distributional  
1312 code for value in dopamine-based reinforcement learning. *Nature* 577, 671–675.
- 1313 Davidson, P.W. (1972). Haptic judgments of curvature by blind and sighted humans. *J. Exp. Psychol.* 93, 43–55.

- 1314 Diamond, M.E. (2010). Texture sensation through the fingertips and the whiskers. *Curr. Opin. Neurobiol.* 20, 319–327.
- 1315 Diamond, M.E., von Heimendahl, M., Knutsen, P.M., Kleinfeld, D., and Ahissar, E. (2008). “Where” and “what” in the whisker  
1316 sensorimotor system. *Nat. Rev. Neurosci.* 9, 601–612.
- 1317 Dominiak, S.E., Nashaat, M.A., Sehara, K., Oraby, H., Larkum, M.E., and Sachdev, R.N.S. (2019). Whisking Asymmetry Signals  
1318 Motor Preparation and the Behavioral State of Mice. *J. Neurosci.* 39, 9818–9830.
- 1319 Douglas, R.J., and Martin, K.A.C. (2004). Neuronal circuits of the neocortex. *Annu. Rev. Neurosci.* 27, 419–451.
- 1320 Drew, P.J., and Feldman, D.E. (2007). Representation of moving wavefronts of whisker deflection in rat somatosensory cortex. *J.*  
1321 *Neurophysiol.* 98, 1566–1580.
- 1322 Ego-Stengel, V., Mello e Souza, T., Jacob, V., and Shulz, D.E. (2005). Spatiotemporal characteristics of neuronal sensory  
1323 integration in the barrel cortex of the rat. *J. Neurophysiol.* 93, 1450–1467.
- 1324 von der Emde (2010). 3-Dimensional scene perception during active electrolocation in a weakly electric pulse fish. *Front. Behav.*  
1325 *Neurosci.* 4, 1–13.
- 1326 Estebanez, L., Férézou, I., Ego-Stengel, V., and Shulz, D.E. (2018). Representation of tactile scenes in the rodent barrel cortex.  
1327 *Neuroscience* 368, 81–94.
- 1328 Fassihi, A., Zuo, Y., and Diamond, M.E. (2020). Making sense of sensory evidence in the rat whisker system. *Curr. Opin.*  
1329 *Neurobiol.* 60, 76–83.
- 1330 Fee, M.S., Mitra, P.P., and Kleinfeld, D. (1997). Central versus peripheral determinants of patterned spike activity in rat vibrissa  
1331 cortex during whisking. *J. Neurophysiol.* 78, 1144–1149.
- 1332 Frandolig, J.E., Matney, C.J., Lee, K., Kim, J., Chevée, M., Kim, S.J., Bickert, A.A., and Brown, S.P. (2019). The Synaptic  
1333 Organization of Layer 6 Circuits Reveals Inhibition as a Major Output of a Neocortical Sublamina. *Cell Rep.* 28, 3131-  
1334 3143.e5.
- 1335 Gamzu, E., and Ahissar, E. (2001). Importance of temporal cues for tactile spatial- frequency discrimination. *J Neurosci* 21, 7416–  
1336 7427.
- 1337 Gibson, J.J. (1962). Observations on active touch. *Psychol. Rev.* 69, 477–491.
- 1338 Goodman, J.M., Tabot, G.A., Lee, A.S., Suresh, A.K., Rajan, A.T., Hatsopoulos, N.G., and Bensmaia, S. (2019). Postural  
1339 Representations of the Hand in the Primate Sensorimotor Cortex. *Neuron* 104, 1000-1009.e7.
- 1340 Gouwens, N.W., Sorensen, S.A., Berg, J., Lee, C., Jarsky, T., Ting, J., Sunkin, S.M., Feng, D., Anastassiou, C.A., Barkan, E., et  
1341 al. (2019). Classification of electrophysiological and morphological neuron types in the mouse visual cortex. *Nat. Neurosci.*  
1342 22, 1182–1195.
- 1343 Grant, R.A., Mitchinson, B., Fox, C.W., and Prescott, T.J. (2009). Active Touch Sensing in the Rat: Anticipatory and Regulatory  
1344 Control of Whisker Movements During Surface Exploration. *J. Neurophysiol.* 101, 862–874.
- 1345 Grant, R.A., Breakell, V., and Prescott, T.J. (2018). Whisker touch sensing guides locomotion in small, quadrupedal mammals.  
1346 *Proc. R. Soc. B Biol. Sci.* 285.
- 1347 Guo, Z. V., Hires, S.A., Li, N., O’Connor, D.H., Komiyama, T., Ophir, E., Huber, D., Bonardi, C., Morandell, K., Gutnisky, D., et al.  
1348 (2014). Procedures for Behavioral Experiments in Head-Fixed Mice. *PLoS One* 9, e88678.
- 1349 Gustafson, J.W., and Felbain-Keramidas, S.L. (1977). Behavioral and neural approaches to the function of the mystacial vibrissae.  
1350 *Psychol. Bull.* 84, 477–488.
- 1351 Harvey, M.A., Bermejo, R., and Zeigler, H.P. (2001). Discriminative whisking in the head-fixed rat: optoelectronic monitoring  
1352 during tactile detection and discrimination tasks. *Somatosens. Mot. Res.* 18, 211–222.
- 1353 Hattori, R., Danskin, B., Babic, Z., Mlynaryk, N., and Komiyama, T. (2019). Area-Specificity and Plasticity of History-Dependent  
1354 Value Coding During Learning. *Cell* 177, 1858-1872.e15.
- 1355 He, K., Zhang, X., Ren, S., and Sun, J. (2015). Deep residual learning for image recognition. *ArXiv*.
- 1356 Hill, D.N., Curtis, J.C., Moore, J.D., and Kleinfeld, D. (2011). Primary motor cortex reports efferent control of vibrissa motion on  
1357 multiple timescales. *Neuron* 72, 344–356.
- 1358 Hires, S.A., Pammer, L., Svoboda, K., and Golomb, D. (2013). Tapered whiskers are required for active tactile sensation. *Elife* 2,  
1359 e01350.
- 1360 Hires, S.A., Gutnisky, D.A., Yu, J., O’Connor, D.H., and Svoboda, K. (2015). Low-noise encoding of active touch by layer 4 in the  
1361 somatosensory cortex. *Elife* 4, 1–18.
- 1362 Hobbs, J.A., Towal, R.B., and Hartmann, M.J.Z. (2016a). Spatiotemporal Patterns of Contact Across the Rat Vibrissal Array  
1363 During Exploratory Behavior. *Front. Behav. Neurosci.* 9, 1–18.
- 1364 Hobbs, J.A., Towal, R.B., and Hartmann, M.J.Z. (2016b). Evidence for Functional Groupings of Vibrissae across the Rodent  
1365 Mystacial Pad. *PLoS Comput. Biol.* 12, 1–36.
- 1366 Hong, Y.K., Lacefield, C.O., Rodgers, C.C., and Bruno, R.M. (2018). Sensation, movement and learning in the absence of barrel  
1367 cortex. *Nature* 561, 542–546.
- 1368 Hooks, B.M., Hires, S.A., Zhang, Y.-X., Huber, D., Petreanu, L., Svoboda, K., and Shepherd, G.M.G. (2011). Laminar analysis of  
1369 excitatory local circuits in vibrissal motor and sensory cortical areas. *PLoS Biol.* 9, e1000572.
- 1370 Huber, D., Gutnisky, D.A., Peron, S., O’Connor, D.H., Wiegert, J.S., Tian, L., Oertner, T.G., Looger, L.L., and Svoboda, K. (2012).  
1371 Multiple dynamic representations in the motor cortex during sensorimotor learning. *Nature* 484, 473–478.
- 1372 Hunter, J.D. (2007). Matplotlib: a 2d graphics environment. *Comput. Sci. Eng.* 9, 90–95.
- 1373 Hutson, K.A., and Masterton, R.B. (1986). The sensory contribution of a single vibrissa’s cortical barrel. *J. Neurophysiol.* 56,  
1374 1196–1223.
- 1375 Insafutdinov, E., Pishchulin, L., Andres, B., Andriluka, M., and Schiele, B. (2016). DeeperCut: A Deeper, Stronger, and Faster  
1376 Multi-Person Pose Estimation Model. *Eur. Conf. Comput. Vis.* 34–50.
- 1377 Isett, B.R., Feasel, S.H., Lane, M.A., and Feldman, D.E. (2018). Slip-Based Coding of Local Shape and Texture in Mouse S1.  
1378 *Neuron* 1–16.
- 1379 Jacob, V., Le Cam, J., Ego-Stengel, V., and Shulz, D.E. (2008). Emergent properties of tactile scenes selectively activate barrel  
1380 cortex neurons. *Neuron* 60, 1112–1125.
- 1381 Jadhav, S.P., Wolfe, J., and Feldman, D.E. (2009). Sparse temporal coding of elementary tactile features during active whisker

- 1382 sensation. *Nat. Neurosci.* 12, 792–800.
- 1383 Jang, Y., Wixted, J.T., and Huber, D.E. (2009). Testing Signal-Detection Models of Yes/No and Two-Alternative Forced-Choice  
1384 Recognition Memory. *J. Exp. Psychol. Gen.* 138, 291–306.
- 1385 Jas, M., Achakulvisut, T., Idrizović, A., Acuna, D., Antalek, M., Marques, V., Odland, T., Garg, R., Agrawal, M., Umegaki, Y., et al.  
1386 (2020). Pyglmnet: Python implementation of elastic-net regularized generalized linear models. *J. Open Source Softw.* 5,  
1387 1959.
- 1388 Johansson, R.S., and Flanagan, J.R. (2009). Coding and use of tactile signals from the fingertips in object manipulation tasks.  
1389 *Nat. Rev. Neurosci.* 10, 345–359.
- 1390 Keller, G.B., and Mrsic-Flogel, T.D. (2018). Predictive Processing: A Canonical Cortical Computation. *Neuron* 100, 424–435.
- 1391 Keller, G.B., Bonhoeffer, T., and Hübener, M. (2012). Sensorimotor mismatch signals in primary visual cortex of the behaving  
1392 mouse. *Neuron* 74, 809–815.
- 1393 Kinnischtzke, A.K., Simons, D.J., and Faselow, E.E. (2014). Motor cortex broadly engages excitatory and inhibitory neurons in  
1394 somatosensory barrel cortex. *Cereb. Cortex* 24, 2237–2248.
- 1395 Klatzky, R.L., and Lederman, S.J. (2011). Haptic object perception: Spatial dimensionality and relation to vision. *Philos. Trans. R.*  
1396 *Soc. B Biol. Sci.* 366, 3097–3105.
- 1397 Knutsen, P.M., Pietr, M., and Ahissar, E. (2006). Haptic object localization in the vibrissal system: behavior and performance. *J.*  
1398 *Neurosci.* 26, 8451–8464.
- 1399 De Kock, C.P.J., Bruno, R.M., Spors, H., and Sakmann, B. (2007). Layer- and cell-type-specific suprathreshold stimulus  
1400 representation in rat primary somatosensory cortex. *J. Physiol.* 581, 139–154.
- 1401 Krakauer, J.W., Ghazanfar, A.A., Gomez-Marín, A., Maciver, M.A., and Poeppel, D. (2017). Neuroscience Needs Behavior:  
1402 Correcting a Reductionist Bias. *Neuron* 93, 480–490.
- 1403 Krupa, D.J., Matell, M.S., Brisben, A.J., Oliveira, L.M., and Nicolelis, M.A. (2001). Behavioral properties of the trigeminal  
1404 somatosensory system in rats performing whisker-dependent tactile discriminations. *J. Neurosci.* 21, 5752–5763.
- 1405 Krupa, D.J., Wiest, M.C., Shuler, M.G., Laubach, M., and Nicolelis, M.A.L. (2004). Layer-specific somatosensory cortical activation  
1406 during active tactile discrimination. *Science* 304, 1989–1992.
- 1407 Laboy-Juárez, K.J., Langberg, T., Ahn, S., and Feldman, D.E. (2019). Elementary motion sequence detectors in whisker  
1408 somatosensory cortex. *Nat. Neurosci.* 22, 1438–1449.
- 1409 Lacefield, C.O., Pnevmatikakis, E.A., Paninski, L., and Bruno, R.M. (2019). Reinforcement Learning Recruits Somata and Apical  
1410 Dendrites across Layers of Primary Sensory Cortex. *Cell Rep.* 26, 2000-2008.e2.
- 1411 Lavzin, M., Levy, S., Benisty, H., Dubin, U., Brosh, Z., Aeed, F., Mensh, B.D., Schiller, Y., Meir, R., Barak, O., et al. (2020). Cell-  
1412 type specific outcome representation in primary motor cortex. *BioRxiv*.
- 1413 Lederman, S.J., and Klatzky, R.L. (1987). Hand movements: a window into haptic object recognition. *Cogn. Psychol.* 19, 342–368.
- 1414 Lyon, L., Saksida, L.M., and Bussey, T.J. (2012). Spontaneous object recognition and its relevance to schizophrenia: a review of  
1415 findings from pharmacological, genetic, lesion and developmental rodent models. *Psychopharmacology (Berl)*. 220, 647–672.
- 1416 Marr, D.C., and Poggio, T. (1976). From understanding computation to understanding neural circuitry. *MIT AI Memos* 357, 1–22.
- 1417 Mathis, A., Mamidanna, P., Cury, K.M., Abe, T., Murthy, V.N., Mathis, M.W., and Bethge, M. (2018). DeepLabCut: markerless  
1418 pose estimation of user-defined body parts with deep learning. *Nat. Neurosci.* 21, 1281–1289.
- 1419 McGinley, M.J., David, S.V., and McCormick, D.A. (2015). Cortical Membrane Potential Signature of Optimal States for Sensory  
1420 Signal Detection. *Neuron* 1–14.
- 1421 McKinney, W. (2010). Data structures for statistical computing in Python. *Proc. 9th Python Sci. Conf.*
- 1422 Mehta, S.B., Whitmer, D., Figueroa, R., Williams, B.A., and Kleinfeld, D. (2007). Active spatial perception in the vibrissa scanning  
1423 sensorimotor system. *PLoS Biol.* 5, e15.
- 1424 Mitchinson, B., Martin, C.J., Grant, R.A., and Prescott, T.J. (2007). Feedback control in active sensing: Rat exploratory whisking is  
1425 modulated by environmental contact. *Proc. R. Soc. B Biol. Sci.* 274, 1035–1041.
- 1426 Mohan, H., de Haan, R., Broersen, R., Pieneman, A.W., Helmchen, F., Staiger, J.F., Mansvelder, H.D., and de Kock, C.P.J.  
1427 (2019). Functional Architecture and Encoding of Tactile Sensorimotor Behavior in Rat Posterior Parietal Cortex. *J. Neurosci.*  
1428 39, 7332–7343.
- 1429 Moore, J.D., Mercer Lindsay, N., Deschênes, M., and Kleinfeld, D. (2015). Vibrissa Self-Motion and Touch Are Reliably Encoded  
1430 along the Same Somatosensory Pathway from Brainstem through Thalamus. *PLoS Biol.* 13, e1002253.
- 1431 Muñoz, W., Tremblay, R., Levenstein, D., and Rudy, B. (2017). Layer-specific modulation of neocortical dendritic inhibition during  
1432 active wakefulness. *Science (80-. )*. 959, 954–959.
- 1433 Musall, S., Kaufman, M.T., Juavinett, A.L., Gluf, S., and Churchland, A.K. (2019). Single-trial neural dynamics are dominated by  
1434 richly varied movements. *Nat. Neurosci.* 22, 1677–1686.
- 1435 Nandy, A., Sharpee, T., Reynolds, J., and Mitchell, J. (2013). The Fine Structure of Shape Tuning in Area V4. *Neuron* 78, 1102–  
1436 1115.
- 1437 Nogueira, R., Abolafia, J.M., Drugowitsch, J., Balaguer-Ballester, E., Sanchez-Vives, M. V., and Moreno-Bote, R. (2017). Lateral  
1438 orbitofrontal cortex anticipates choices and integrates prior with current information. *Nat. Commun.* 8.
- 1439 Nogueira, R., Peltier, N.E., Anzai, A., DeAngelis, G.C., Martínez-Trujillo, J., and Moreno-Bote, R. (2020). The effects of population  
1440 tuning and trial-by-trial variability on information encoding and behavior. *J. Neurosci.* 40, 1066–1083.
- 1441 O'Connor, D.H., Clack, N.G., Huber, D., Komiyama, T., Myers, E.W., and Svoboda, K. (2010a). Vibrissa-based object localization  
1442 in head-fixed mice. *J. Neurosci.* 30, 1947–1967.
- 1443 O'Connor, D.H., Peron, S.P., Huber, D., and Svoboda, K. (2010b). Neural activity in barrel cortex underlying vibrissa-based object  
1444 localization in mice. *Neuron* 67, 1048–1061.
- 1445 O'Connor, D.H., Hires, S.A., Guo, Z. V, Li, N., Yu, J., Sun, Q.-Q., Huber, D., and Svoboda, K. (2013). Neural coding during active  
1446 somatosensation revealed using illusory touch. *Nat. Neurosci.* 16, 958–965.
- 1447 Pachitariu, M., Steinmetz, N., Kadir, S., Carandini, M., and Harris, K.D. (2016). Kilosort: realtime spike-sorting for extracellular  
1448 electrophysiology with hundreds of channels. *BioRxiv* 061481.
- 1449 Pammer, L., O'Connor, D.H., Hires, S.A., Clack, N.G., Huber, D., Myers, E.W., and Svoboda, K. (2013). The mechanical variables

- 1450 underlying object localization along the axis of the whisker. *J. Neurosci.* 33, 6726–6741.
- 1451 Park, I.M., Meister, M.L.R., Huk, A.C., and Pillow, J.W. (2014). Encoding and decoding in parietal cortex during sensorimotor  
1452 decision-making. *Nat. Neurosci.* 17, 1395–1403.
- 1453 Pedregosa, F., Varoquaux, G., Gramfort, A., Michel, V., Thirion, B., Grisel, O., Blondel, M., Prettenhofer, P., Weiss, R., Dubourg,  
1454 V., et al. (2011). Scikit-learn. *J. Mach. Learn. Res.* 12, 2825–2830.
- 1455 Perez, F., and Granger, B.E. (2007). IPython: A System for Interactive Scientific Computing. *Comput. Sci. Eng.* 9.
- 1456 Peron, S.P., Freeman, J., Iyer, V., Guo, C., and Svoboda, K. (2015). A Cellular Resolution Map of Barrel Cortex Activity during  
1457 Tactile Behavior. *Neuron* 1–17.
- 1458 Petersen, R.S., Rodriguez, A.C., Evans, M.H., Campagner, D., and Loft, M.S.E. (2020). A system for tracking whisker kinematics  
1459 and whisker shape in three dimensions. *PLoS Comput. Biol.* 16, 1–24.
- 1460 Petreanu, L., Gutnisky, D.A., Huber, D., Xu, N., O'Connor, D.H., Tian, L., Looger, L., and Svoboda, K. (2012). Activity in motor-  
1461 sensory projections reveals distributed coding in somatosensation. *Nature* 489, 299–303.
- 1462 Pishchulin, L., Insafuldinov, E., Tang, S., Andres, B., Andriluka, M., Gehler, P., and Schiele, B. (2015). DeepCut: Joint Subset  
1463 Partition and Labeling for Multi Person Pose Estimation.
- 1464 Pluta, S.R., Lyall, E.H., Telian, G.I., Ryapolova-Webb, E., and Adesnik, H. (2017). Surround Integration Organizes a Spatial Map  
1465 during Active Sensation. *Neuron* 94, 1220-1233.e5.
- 1466 Pluta, S.R., Telian, G.I., Naka, A., and Adesnik, H. (2019). Superficial layers suppress the deep layers to fine-tune cortical coding.  
1467 *J. Neurosci.* 39, 2052–2064.
- 1468 Polley, D.B., Rickert, J.L., and Frostig, R.D. (2005). Whisker-based discrimination of object orientation determined with a rapid  
1469 training paradigm. *Neurobiol. Learn. Mem.* 83, 134–142.
- 1470 Quist, B.W., Seghete, V., Huet, L.A., Murphey, T.D., and Hartmann, M.J.Z. (2014). Modeling Forces and Moments at the Base of  
1471 a Rat Vibrissa during Noncontact Whisking and Whisking against an Object. *J. Neurosci.* 34, 9828–9844.
- 1472 Ramalingam, N., McManus, J.N.J., Li, W., and Gilbert, C.D. (2013). Top-down modulation of lateral interactions in visual cortex. *J.*  
1473 *Neurosci.* 33, 1773–1789.
- 1474 Ramirez, A., Pnevmatikakis, E.A., Merel, J., Paninski, L., Miller, K.D., and Bruno, R.M. (2014). Spatiotemporal receptive fields of  
1475 barrel cortex revealed by reverse correlation of synaptic input. *Nat. Neurosci.* 17, 866–875.
- 1476 Ranganathan, G.N., Apostolides, P.F., Harnett, M.T., Xu, N.L., Druckmann, S., and Magee, J.C. (2018). Active dendritic  
1477 integration and mixed neocortical network representations during an adaptive sensing behavior. *Nat. Neurosci.* 21, 1583–  
1478 1590.
- 1479 Rigotti, M., Barak, O., Warden, M.R., Wang, X.-J., Daw, N.D., Miller, E.K., and Fusi, S. (2013). The importance of mixed selectivity  
1480 in complex cognitive tasks. *Nature* 497, 585–590.
- 1481 Ritt, J.T., Andermann, M.L., and Moore, C.I. (2008). Embodied information processing: vibrissa mechanics and texture features  
1482 shape micromotions in actively sensing rats. *Neuron* 57, 599–613.
- 1483 Robertson, C.E., and Baron-Cohen, S. (2017). Sensory perception in autism. *Nat. Rev. Neurosci.* 18, 671–684.
- 1484 Rossant, C., Kadir, S.N., Goodman, D.F.M., Schulman, J., Hunter, M.L.D., Saleem, A.B., Grosmark, A., Belluscio, M., Denfield,  
1485 G.H., Ecker, A.S., et al. (2016). Spike sorting for large, dense electrode arrays. *Nat. Neurosci.* 19, 634–641.
- 1486 Rothschild, G., Nelken, I., and Mizrahi, A. (2010). Functional organization and population dynamics in the mouse primary auditory  
1487 cortex. *Nat. Neurosci.* 13, 353–360.
- 1488 Sachdev, R.N.S., Sellien, H., and Ebner, F. (2001). Temporal organization of multi-whisker contact in rats. *Somatosens. Mot. Res.*  
1489 18, 91–100.
- 1490 Schneider, D.M., Sundararajan, J., and Mooney, R. (2018). A cortical filter that learns to suppress the acoustic consequences of  
1491 movement. *Nature* 561, 391–395.
- 1492 Schulman, A.J., and Mitchell, R.R. (1966). Operating Characteristics from Yes-No and Forced-Choice Procedures. *J. Acoust. Soc.*  
1493 *Am.* 40, 473–477.
- 1494 Schwarz, C. (2016). The Slip Hypothesis: Tactile Perception and its Neuronal Bases. *Trends Neurosci.* 39, 449–462.
- 1495 Severson, K.S., Xu, D., Yang, H., and O'Connor, D.H. (2019). Coding of whisker motion across the mouse face. *Elife* 8, 1–23.
- 1496 Sharpee, T.O. (2013). Computational Identification of Receptive Fields. *Annu. Rev. Neurosci.* 36, 103–120.
- 1497 Sippy, T., Lapray, D., Crochet, S., and Petersen, C.C.H. (2015). Cell-Type-Specific Sensorimotor Processing in Striatal Projection  
1498 Neurons during Goal-Directed Behavior. *Neuron* 1–8.
- 1499 Steinmetz, N.A., and Moore, T. (2010). Changes in the response rate and response variability of area V4 neurons during the  
1500 preparation of saccadic eye movements. *J. Neurophysiol.* 103, 1171–1178.
- 1501 Stringer, C., Pachitariu, M., Steinmetz, N., Reddy, C.B., Carandini, M., and Harris, K.D. (2019). Spontaneous behaviors drive  
1502 multidimensional, brainwide activity. *Science* (80- ). 364.
- 1503 Stüttgen, M.C., and Schwarz, C. (2018). Barrel cortex: What is it good for? *Neuroscience* 368, 3–16.
- 1504 Thakur, P.H., Bastian, A.J., and Hsiao, S.S. (2008). Multidigit movement synergies of the human hand in an unconstrained haptic  
1505 exploration task. *J. Neurosci.* 28, 1271–1281.
- 1506 Thakur, P.H., Fitzgerald, P.J., and Hsiao, S.S. (2012). Second-order receptive fields reveal multidigit interactions in area 3b of the  
1507 macaque monkey. *J. Neurophysiol.* 108, 243–262.
- 1508 Tsutsui, K.I., Grabenhorst, F., Kobayashi, S., and Schultz, W. (2016). A dynamic code for economic object valuation in prefrontal  
1509 cortex neurons. *Nat. Commun.* 7.
- 1510 Vilarchao, M.E., Estebanez, L., Shulz, D.E., and Férézou, I. (2018). Supra-barrel Distribution of Directional Tuning for Global  
1511 Motion in the Mouse Somatosensory Cortex. *Cell Rep.* 22, 3534–3547.
- 1512 Vinck, M., Batista-Brito, R., Knoblich, U., and Cardin, J.A. (2015). Arousal and Locomotion Make Distinct Contributions to Cortical  
1513 Activity Patterns and Visual Encoding. *Neuron* 1–15.
- 1514 Virtanen, P., Gommers, R., Oliphant, T.E., Haberland, M., Reddy, T., Cournapeau, D., Burovski, E., Peterson, P., Weckesser, W.,  
1515 Bright, J., et al. (2020). SciPy 1.0: fundamental algorithms for scientific computing in Python. *Nat. Methods* 17.
- 1516 Voigts, J., Sakmann, B., and Celikel, T. (2008). Unsupervised whisker tracking in unrestrained behaving animals. *J. Neurophysiol.*  
1517 100, 504–515.

- 1518 Voigts, J., Herman, D.H., and Celikel, T. (2015). Tactile object localization by anticipatory whisker motion. *J. Neurophysiol.* *113*,  
1519 620–632.
- 1520 Waiblinger, C., Whitmire, C.J., Sederberg, A., Stanley, G.B., and Schwarz, C. (2018). Primary tactile thalamus spiking reflects  
1521 cognitive signals. *J. Neurosci.* *38*, 4870–4885.
- 1522 Wallach, A., Deutsch, D., Oram, T., and Ahissar, E. (2020). Predictive whisker kinematics reveal context-dependent sensorimotor  
1523 strategies. *PLoS Biol.* *18*, e3000571.
- 1524 Van Der Walt, S., Colbert, S.C., and Varoquaux, G. (2011). The NumPy array: A structure for efficient numerical computation.  
1525 *Comput. Sci. Eng.* *13*, 22–30.
- 1526 Van Der Walt, S., Schönberger, J.L., Nunez-Iglesias, J., Boulogne, F., Warner, J.D., Yager, N., Gouillart, E., and Yu, T. (2014).  
1527 Scikit-image: Image processing in python. *PeerJ* *2014*, 1–18.
- 1528 Wang, H.C., LeMessurier, A.M., and Feldman, D.E. (2019). Whisker map organization in somatosensory cortex of awake,  
1529 behaving mice. *BioRxiv* 587634.
- 1530 Wang, Q., Webber, R.M., and Stanley, G.B. (2010). Thalamic synchrony and the adaptive gating of information flow to cortex. *Nat.*  
1531 *Neurosci.* *13*, 1534–1543.
- 1532 Yang, A.E.T., and Hartmann, M.J.Z. (2016). Whisking Kinematics Enables Object Localization in Head-Centered Coordinates  
1533 Based on Tactile Information from a Single Vibrissa. *Front. Behav. Neurosci.* *10*, 1–15.
- 1534 Yang, H., Kwon, S.E., Severson, K.S., and O'Connor, D.H. (2016a). Origins of choice-related activity in mouse somatosensory  
1535 cortex. *Nat. Neurosci.* *19*.
- 1536 Yang, S.C.-H., Lengyel, M., and Wolpert, D.M. (2016b). Active sensing in the categorization of visual patterns. *Elife* *5*, 1–22.
- 1537 Yang, S.C.H., Wolpert, D.M., and Lengyel, M. (2016c). Theoretical perspectives on active sensing. *Curr. Opin. Behav. Sci.* *11*,  
1538 100–108.
- 1539 Yau, J.M., Pasupathy, A., Fitzgerald, P.J., Hsiao, S.S., and Connor, C.E. (2009). Analogous intermediate shape coding in vision  
1540 and touch. *Proc. Natl. Acad. Sci. U. S. A.* *106*, 16457–16462.
- 1541 Yu, J., Gutnisky, D.A., Hires, S.A., and Svoboda, K. (2016). Layer 4 fast-spiking interneurons filter thalamocortical signals during  
1542 active somatosensation. *Nat. Neurosci.* *19*, 1–14.
- 1543 Yu, J., Hu, H., Agmon, A., and Svoboda, K. (2019). Recruitment of GABAergic Interneurons in the Barrel Cortex during Active  
1544 Tactile Behavior. *Neuron* *104*, 412-427.e4.
- 1545 Zuo, Y., and Diamond, M.E. (2019a). Rats Generate Vibrissal Sensory Evidence until Boundary Crossing Triggers a Decision.  
1546 *Curr. Biol.* *29*, 1415-1424.e5.
- 1547 Zuo, Y., and Diamond, M.E. (2019b). Texture Identification by Bounded Integration of Sensory Cortical Signals. *Curr. Biol.* *29*,  
1548 1425-1435.e5.
- 1549
- 1550

1551

## Supplemental Information

1552

### Supplemental Figure 1, related to Figure 1.

1553

Generalization to more difficult stimuli and no-whisker controls.

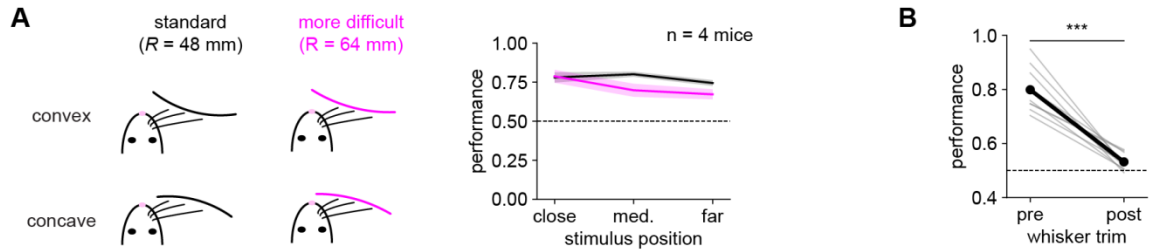

1554

1555

1556

1557

1558

1559

1560

1561

1562

- A)** We trained a subset of mice on more difficult stimuli with a larger radius of curvature (pink). After some retraining, mice were able to perform well at these new stimuli, though at a slightly lower performance than for the original stimuli. Error bars: SEM over mice.
- B)** Effect of trimming all whiskers on the performance of  $n = 10$  mice performing the shape discrimination or detection tasks. “Pre”: average performance on the three sessions preceding whisker trim. “Post”: performance on the first session after whisker trim. Thin lines: individual mice. Thick line: average. Performance significantly decreased (paired t-test,  $p < .001$ ) from 80.0% to 53.2%, near chance (50%, dashed line).

1563

## Supplemental Figure 2, related to Figure 2.

1564

### High-speed videography and whisking/contact statistics.

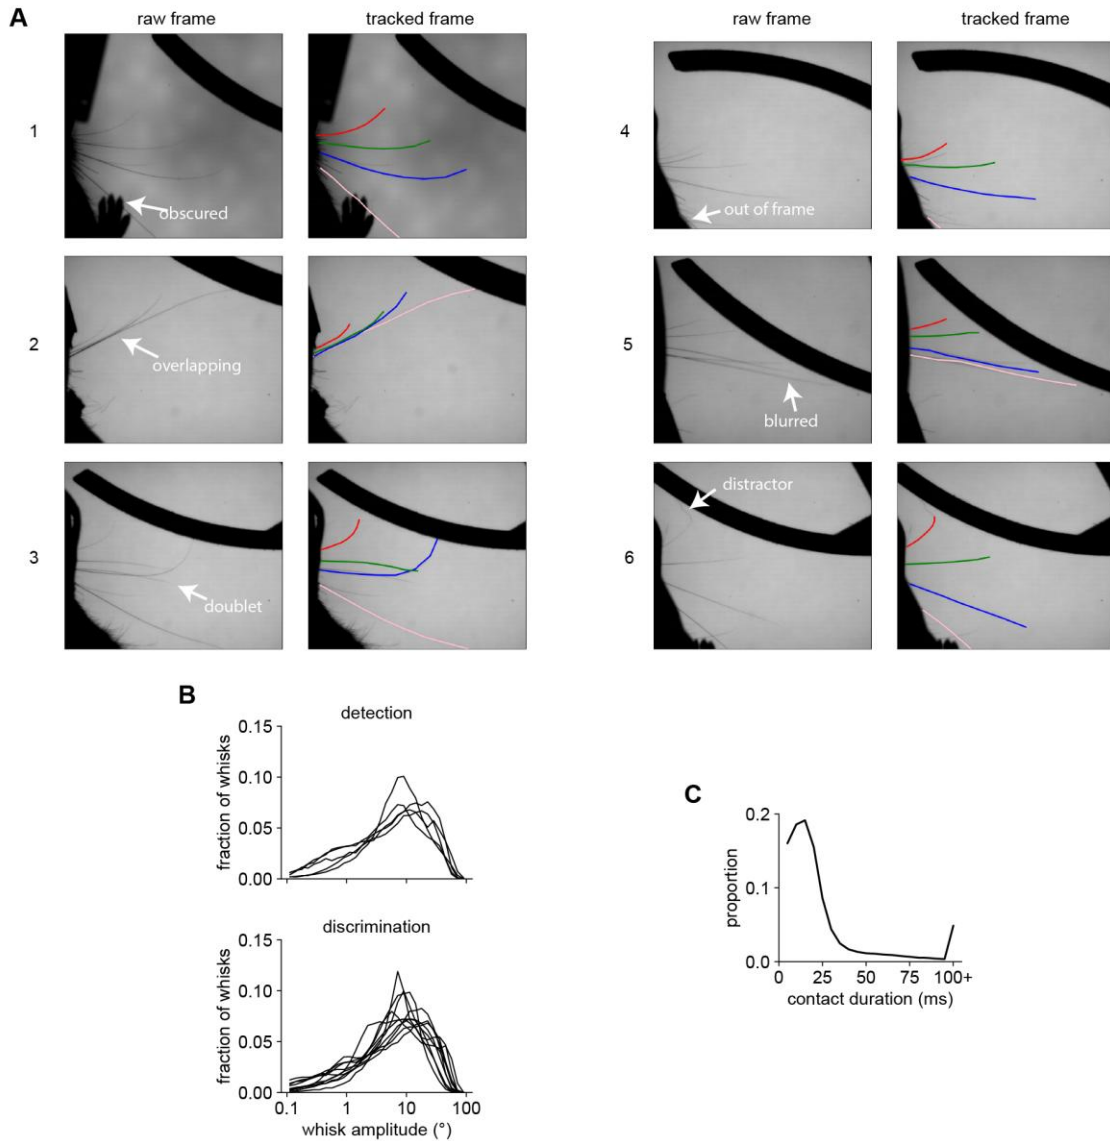

1565

1566 **A)** Example frames demonstrating the quality of the whisker tracking. Within each pair of frames, the left frame is the raw frame  
 1567 (annotated with the region of interest) and the right frame shows the result of the whisker tracking algorithm. Performance  
 1568 was good (i.e., the correct whiskers were tracked throughout their extent) even when:

- 1569 1) the whisker was obscured by a paw;
- 1570 2) whiskers were nearly overlapping;
- 1571 3) a “doublet” whisker emerged from the same follicle;
- 1572 4) the whisker was nearly out of frame;
- 1573 5) motion blurred the tips;
- 1574 6) a similar-looking distractor hair was attached to the end of the whisker.

1575

1576 **B)** Distribution of amplitudes of individual whisk cycles, with each line representing an individual mouse. Distributions were  
 1577 similar across mice, regardless of the task (top: detection; bottom: discrimination).

1578

1579 **C)** Distribution of contact durations. Data were similar across tasks and therefore pooled. Most contacts were short but there was  
 1580 a long tail of longer contacts. Contact durations are quantized at the frame rate of 5 ms.

1581



1582

## Supplemental Figure 3, related to Figure 3.

1583

### Behavioral decoding analysis.

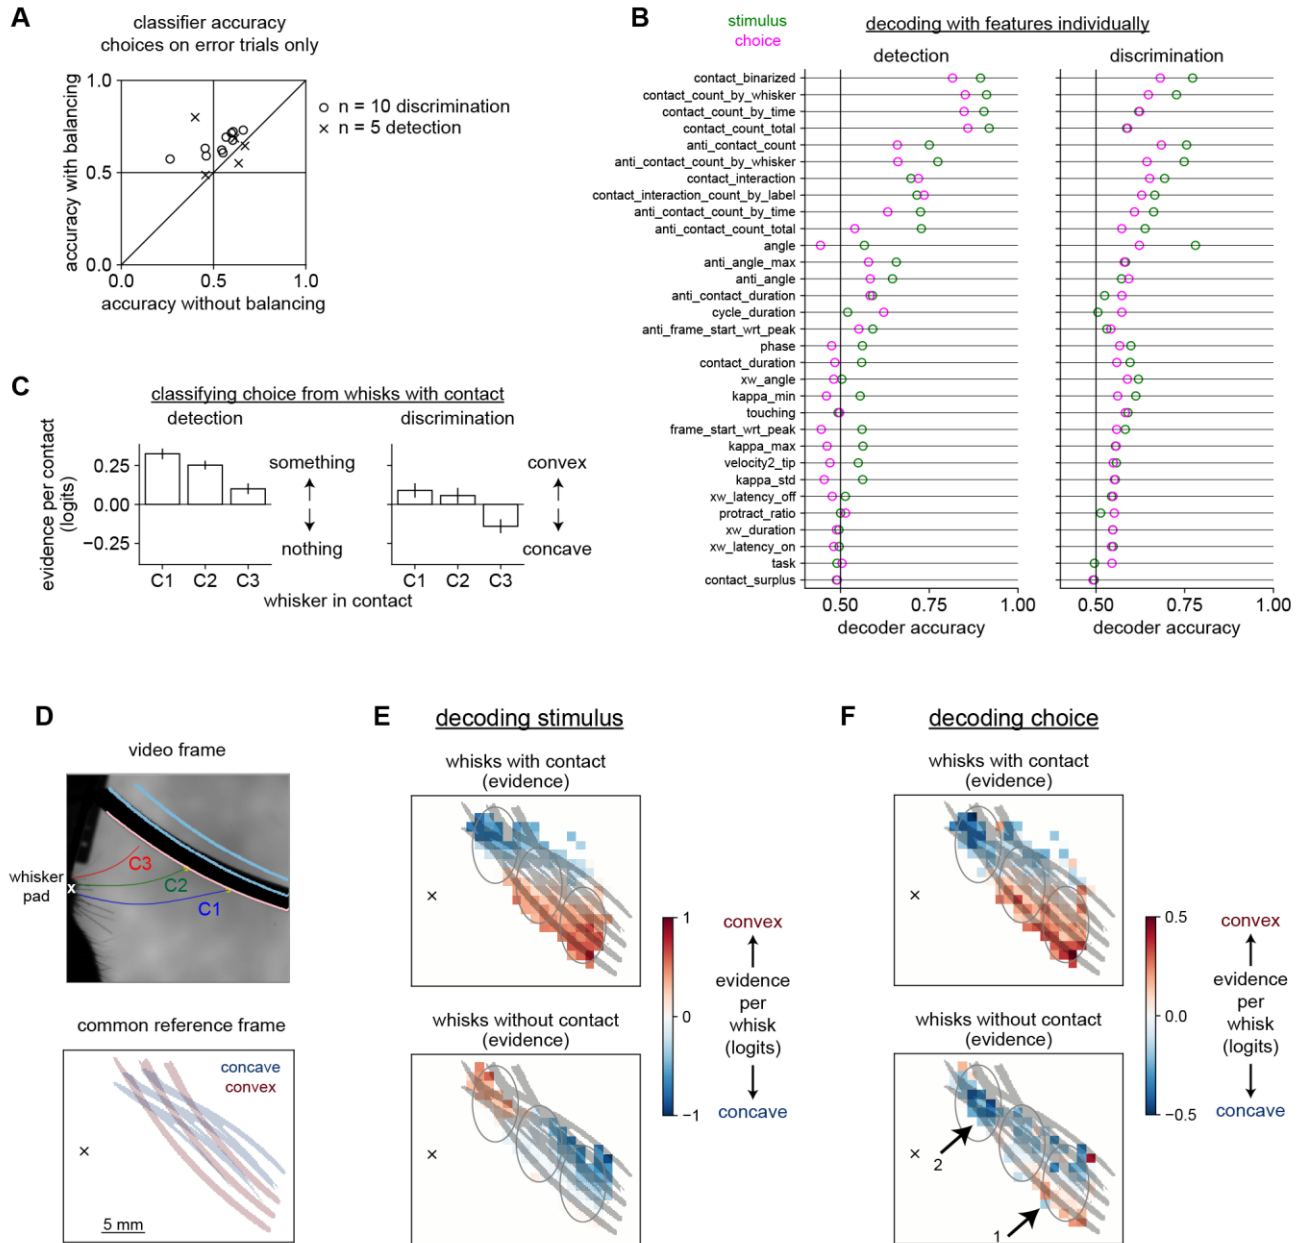

1584

1585

1586

1587

1588

1589

1590

1591

1592

1593

1594

1595

1596

1597

1598

1599

1600

1601

- A)** Accuracy of the behavioral decoders with and without trial balancing. The version described in the main manuscript uses balancing to equally weight correct and incorrect trials, and is plotted on the y-axis. We also trained a separate classifier that did not apply any balancing, but simply optimized its prediction of choice over all trials equally as in standard logistic regression; that accuracy is plotted on the x-axis. In both cases, the decoders had access to the full set of behavioral features. Here, we show the performance only on decoding choice on incorrect trials. Trial balancing improved the accuracy on this trial type in almost all cases and was always greater than 50%. On correct trials (data not shown), trial balancing slightly impaired performance, but was still quite high (*cf.* Fig 3D).
- B)** (Related to Fig 3B) The performance of classifiers trained on every individual feature. See Supplemental Table 1 on the following page for descriptions of each features.
- C)** (Related to Fig 3G) The weights used to predict choice from whisks with contact. The results were qualitatively similar to the weights used to predict stimulus (Fig 3G). During discrimination, C1 and C3 weights have opposite sign.
- D,E)** Replotted from Fig 3I,K for comparison.
- F)** The same data (top: whisks with contact; bottom: whisks without contact) now colored by the evidence they contain about choice, *i.e.* whether the mouse would report the shape to be concave (blue) or convex (red). The top panel is similar to the analogous panel in (E), indicating that mice correctly interpret whisks with contact in accordance with the ideal stimulus decoding. In the bottom panel, some whisks without contact are correctly interpreted by the mouse (that is, they look the same as in the analogous panel in (E)), but others are not. Specifically, in area 1, whisks without contact around the location

1602 of the closest convex shape indicate that the mouse would report convex. In area 2, whiskers without contact around the  
 1603 location of the closest concave shape indicate that the mouse would report concave. This suggests that the mouse may be  
 1604 sampling these areas preferentially because it believes the corresponding shape is present.  
 1605

## Supplemental Table 1

1606 Defines the variables used in Supplemental Fig 3B, the entire list of features considered for inclusion in the behavioral decoders.  
 1607

|                                    |                                                                                                                                                                                                                                                                                                                    |
|------------------------------------|--------------------------------------------------------------------------------------------------------------------------------------------------------------------------------------------------------------------------------------------------------------------------------------------------------------------|
| contact_binarized                  | Referred to as “whiskers with contact” in the main text. A two-dimensional (whisker x time) binary array representing when each whisker was in contact over the course of the trial.                                                                                                                               |
| contact_count_by_whisker           | The sum of the rows of “contact_binarized”, so the number of contacts over the entire trial made by each whisker.                                                                                                                                                                                                  |
| contact_count_by_time              | The sum of the columns of “contact_binarized”, so the number of contacts in each time bin                                                                                                                                                                                                                          |
| contact_count_total                | The sum of the “contact_binarized”, a single integer representing the total number of contacts made by all whiskers over all timepoints                                                                                                                                                                            |
| anti_contact_count                 | Like “contact_binarized”, but for whisks without contact.                                                                                                                                                                                                                                                          |
| anti_contact_count_by_whisker      | Like “contact_count_by_whisker”, but for whisks without contact.                                                                                                                                                                                                                                                   |
| contact_interaction                | Like “contact_binarized”, but for simultaneous contact made by two whiskers. The rows are all adjacent pairs of whiskers, and the columns are still time. We did not consider non-adjacent pairs as such contacts were quite infrequent.                                                                           |
| contact_interaction_count_by_label | The sum of “contact_interaction” over time, so the total number of simultaneous contacts by each possible pair of whiskers over the entire trial.                                                                                                                                                                  |
| anti_contact_count_by_time         | Like “contact_count_by_time”, but for whisks without contact.                                                                                                                                                                                                                                                      |
| angle                              | Referred to as “contact angle” in the main text. A two-dimensional (whisker x time) array representing the angle of contact of each whisker at each time in the trial. Contains null values where no contact occurred. When multiple contacts made by a whisker within a certain time bin, uses the average angle. |
| anti_contact_count_total           | Like contact_count_total, but for whisks without contact                                                                                                                                                                                                                                                           |
| anti_contact_count_by_whisker      | Like contact_count_by_whisker, but for whisks without contact                                                                                                                                                                                                                                                      |
| anti_angle_max                     | Like “angle”, but for whisks without contact. Uses the peak angle of the whisk without contact.                                                                                                                                                                                                                    |
| anti_angle                         | Like “anti_angle_max”, but instead of using the peak angle, uses the angle at which the whisk crossed the boundary where the shapes could have been present.                                                                                                                                                       |
| anti_contact_duration              | Like “contact_duration”, but for whisks without contact. The time during which the whisker was beyond the boundary where the shapes could have been present.                                                                                                                                                       |
| contact_duration                   | A two-dimensional (whisker x time) array representing the duration of contacts made by each whisker in that time bin. Contains null values where no contact occurred. When multiple contacts made by a whisker within a certain time bin, uses the average duration.                                               |
| frame_start_wrt_peak               | A two-dimensional (whisker x time) array representing the time of each contact relative to the peak of the whisk cycle on which it occurred. Contains null values where no contact occurred. When multiple contacts made by a whisker within a certain time bin, uses the average of each contact.                 |
| xw_angle                           | Cross-whisker angle. Like contact_interaction, but instead of a binary variable, it is the difference in angle between the two contacting whiskers at the time of contact. Contains null values where no such simultaneous contact occurred.                                                                       |
| phase                              | Like “angle”, but the phase of the contact.                                                                                                                                                                                                                                                                        |
| kappa_min                          | Like “angle”, but the minimum value of delta kappa achieved during the contact.                                                                                                                                                                                                                                    |
| anti_frame_start_wrt_peak          | Like “frame_start_wrt_peak”, but for whisks without contact.                                                                                                                                                                                                                                                       |
| cycle_duration                     | A one-dimensional array versus timebins. The average duration of each whisk cycle.                                                                                                                                                                                                                                 |
| kappa_std                          | Referred to as “contact-induced bending” in the manuscript. Like “kappa_min”, but the standard deviation of delta kappa within the contact.                                                                                                                                                                        |
| kappa_max                          | Like “kappa_min”, but the maximum value of delta kappa within the contact.                                                                                                                                                                                                                                         |
| touching                           | Like “contact_binarized”, but nonzero whenever the whiskers is in contact, rather than just at the onset of the contact. Thus, it will be nonzero whenever “contact_binarized” is nonzero, but also on bins when the whisker maintained contact for more than one cycle.                                           |
| velocity2_tip                      | Like “angle”, but the angular velocity of the whisker averaged over the two frames preceding contact.                                                                                                                                                                                                              |
| xw_latency_on                      | Like “xw_angle”, but the time between contact onset of the two adjacent whiskers.                                                                                                                                                                                                                                  |
| xw_duration                        | Like “xw_angle”, but the mean duration of the contact onset of the two adjacent whiskers.                                                                                                                                                                                                                          |
| xw_latency_off                     | Like “xw_angle_on”, but for the contact offset times.                                                                                                                                                                                                                                                              |
| protract_ratio                     | Like “cycle_duration”, but the ratio between protraction time and the entire cycle duration.                                                                                                                                                                                                                       |
| task                               | Three variables: previous choice (left or right), previously rewarded side (left, right, or null if previous trial was not rewarded), and previously unrewarded side (left, right, or null if previous trial was rewarded).                                                                                        |
| contact_surplus                    | Like “contact_binarized”, but the number of contacts on each whisk cycle minus one (instead of just a binary yes/no about contact).                                                                                                                                                                                |

1608

1609 **Supplemental Figure 4, related to Figure 4.**  
1610 Neural responses to whisks with and without contact.  
1611

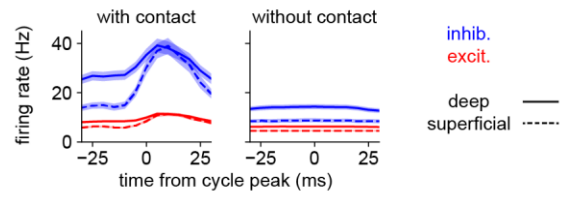

1612

1613

1614 The same data from Fig 4D, but plotted in Hz instead of normalized to baseline. The results are qualitatively similar, but the  
1615 inhibitory cells (blue) show a much higher baseline firing rate than the excitatory cells (red).

1616

1617 Error bars: SEM over neurons.

1618

1619

## Supplemental Figure 6, related to Figure 6.

1620

### Task-specific contact responses and somatopy.

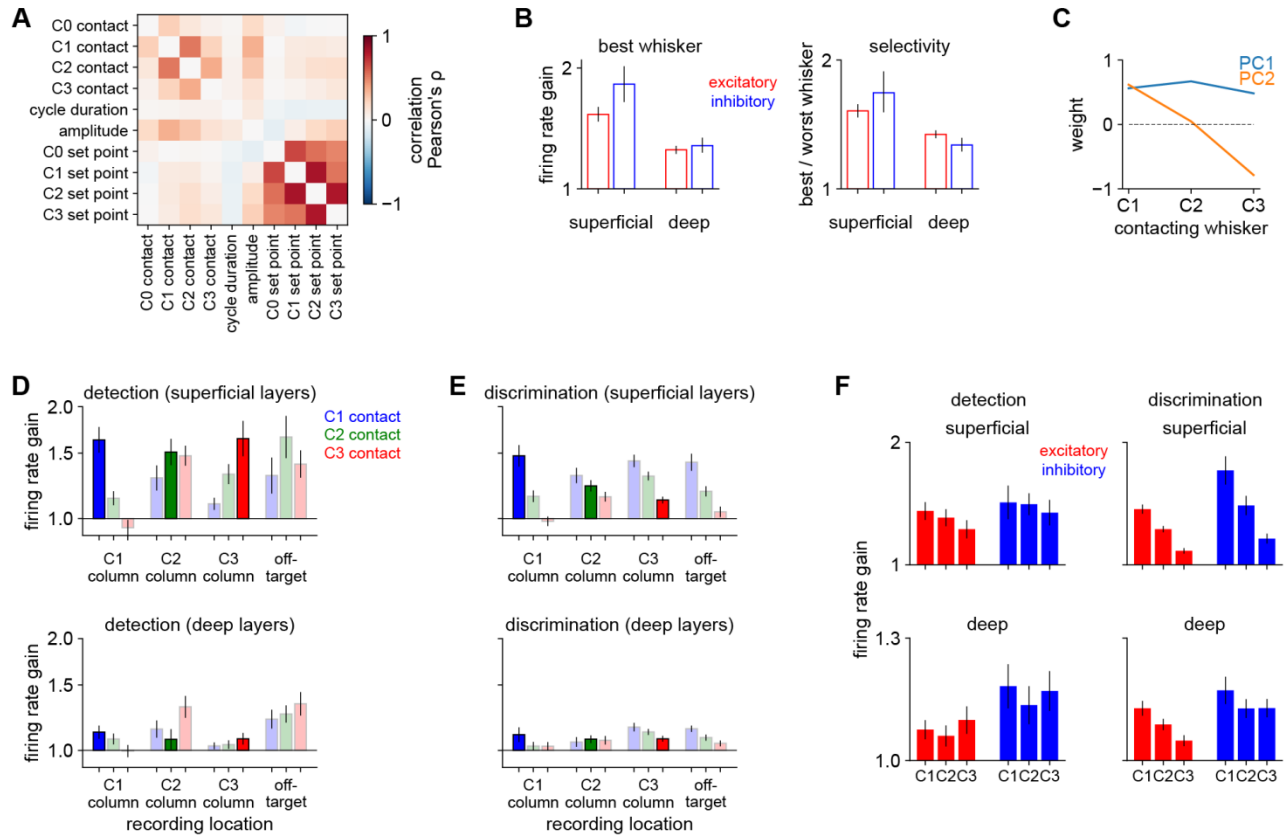

1621

1622 **A)** Feature correlation matrix. We concatenated the features over all sessions and calculated Pearson's  $\rho$  between every pair of  
 1623 features. For clarity, task-related temporal indicator variables are not included here because they are orthogonal by design,  
 1624 and auto-correlation values along the diagonal are masked.

1625 **B)** *Left*: Similar to Fig 6E, but showing the response to the best whisker (*i.e.*, the whisker that evokes the strongest response in  
 1626 each neuron) instead of the average across C1-C3. The pattern is the same as in the main text: superficial neurons respond  
 1627 more strongly. *Right*: the selectivity of each neuron, parameterized as the response to the best whisker divided by the  
 1628 response to the worst whisker. Error bars: 95% bootstrapped confidence intervals.

1629 **C)** Principle component analysis (PCA) applied to the response of each neuron to contacts made by each whisker. The first PC  
 1630 (blue) is nearly equal on all whiskers whereas the second PC tracks the anterior-posterior position of whiskers C1-C3. Thus,  
 1631 the first PC captures overall response strength and the second PC captures topographic preference (C1>C3 or vice versa).  
 1632 These two PCs capture 63% and 28% of the variance in contact responses.

1633 **D)** The response to contacts by each whisker during shape detection, separately plotted by the cortical column in which they  
 1634 were recorded (C1, C2, C3, or "off-target", meaning all other columns). Superficial neurons (top) show somatopy, typically  
 1635 preferring their topographically aligned whisker (dark bars) over all others (light bars). Deep neurons (bottom) show weaker  
 1636 responses and less somatopy. Error bars: SEM over neurons.

1637 **E)** Similar to (D), but for the shape discrimination task. The preference for C1 contacts (blue bars) dominates somatopic  
 1638 responses (dark bars).

1639 **F)** Similar to (D) and (E), but pooling over recording locations and separately plotting by cell type (excitatory: red; inhibitory:  
 1640 blue). All populations prefer C1 contacts during discrimination (right).

1641

1642  $n = 235$  neurons during detection and 675 neurons during discrimination. We excluded sessions in which too few contacts were  
 1643 made by any whisker (C1-C3) to estimate the response. Logarithmic y-axis in B (left) and D-F.

1644

1645 **Supplemental Video 1**

1646

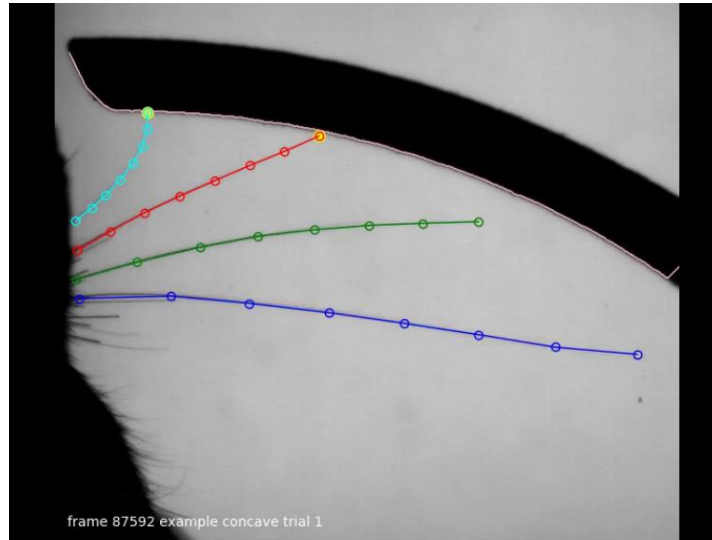

1647

1648

1649

1650 This video demonstrates some example trials of the shape discrimination behavior. A single frame is shown here for illustration.  
1651 The whisker tracking is overlaid (C0, blue; C1, green; C2, red; C3, cyan; circles indicate individually tracked “joints”). Yellow  
1652 circles appear when any tip contacts the edge of the shape (pink line). Four example correct trials (two concave and two convex)  
1653 are included. The playback speed is 0.15x real-time.

1654

1655

## Supplemental Video 2

1656

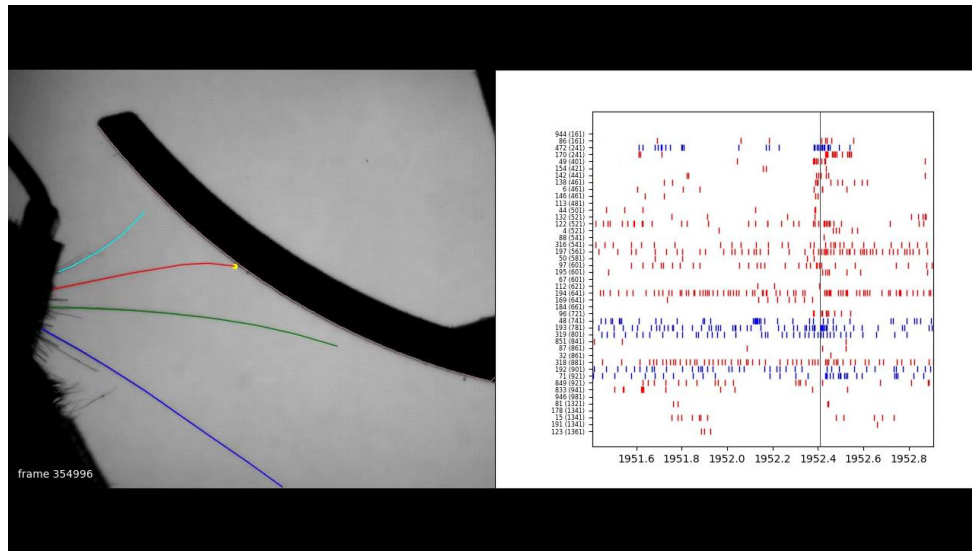

1657

1658

1659

1660

1661

1662

1663

1664

1665

This video demonstrates simultaneously recorded neural activity and behavior. A single frame is shown here for illustration. The left half of the frame shows the behavior, as in Supplemental Video 1 (excluding the tracked joints for clarity). The right half of the frame shows the neural spiking, synchronized with the behavior. Individual neurons (red: excitatory; blue: inhibitory) are plotted as separate rows. Neurons are sorted from superficial (top) to deep (bottom). The small text labels next to each row indicate the unit number and, in parentheses, the depth in microns from the cortical surface. An audio track plays the spikes from single example neurons, as annotated throughout the video. As in Supplemental Video 1, the playback speed is 0.15x real-time.
